# Supplementary material for: Linking canopy reflectance to crop structure and photosynthesis to capture and interpret spatiotemporal dimensions of per-field photosynthetic productivity
Source: Copernicus journal article supplement (doi:10.5194/bg-2016-492), 2016-11-18
Supplement: Supplementary file [file bg-2016-492-AC3-supplement.pdf]

# Linking canopy reflectance to crop structure and photosynthesis to capture and interpret spatiotemporal dimensions of per-field photosynthetic productivity

5 **Abstract.** Nitrogen and water availability are two staple environmental elements in agroecosystems that can substantially alter canopy structure and physiology then crop growth, yielding large impacts on ecosystem regulating/production provisions. However, to date, explicitly quantifying such impacts remains challenging partially due to lack of adequate methodology to capture spatial dimensions of ecosystem changes associated with nitrogen and water effects. A data assimilation, where close-range remote sensing measurements of vegetation indices derived from a hand-held instrument and  
10 an unmanned aerial vehicle (UAV) system are linked to leaf and canopy photosynthetic traits quantified at plot level by portable chamber systems, was applied to capture and interpret inter- and intra-field variations in gross primary productivity (GPP) in lowland rice grown under flooded condition (paddy rice, PD) subject to three available nutrient availability and under rainfed condition (RF) in an East-Asian monsoon region of South Korea. Spatial variations (SVs) in both GPP and light use efficiency ( $LUE_{cabs}$ ) early in growing season were amplified by nitrogen addition. The nutritional effects narrowed  
15 over time. Shift planting culture from flooded to rainfed conditions strengthened SVs in GPP and  $LUE_{cabs}$ . Intervention of prolonged drought late in the growing season dramatically intensified SVs that were supposed to seasonally decrease. Nevertheless, nitrogen addition effects on SV of  $LUE_{cabs}$  at early growth stage made PD field exert greater SVs than RF field. SV of GPP across PD and RF rice were likely related to leaf area index (LAI) development less to  $LUE_{cabs}$ , while numerical analysis suggested that consider spatial variation and strength in  $LUE_{cabs}$  for the same crop type tends to be vital for better  
20 evaluation in landscape/regional patterns of ecosystem photosynthetic productivity at critical phenology stages.

**Key words:** photosynthesis, remote sensing, rice, spatial variation, UAV

## 1 Introduction

Agricultural landscape in most Asia monsoon regions is featured by multicultural cropping systems comprising relatively  
25 small land holdings under 2 ha (Devendra, 2007). Changes in phenology of those crop ecosystems, where rice makes up a larger portion and exerts a rapid completion of life cycle in a short period of time with markedly changes in canopy dynamics, are of significant importance in regional controls of carbon balance and biogeochemical processes (Kwon et al., 2010; Lindner et al., 2015; Xue et al., 2017) and tend to be one of the drivers causing seasonal fluctuations of atmospheric  $CO_2$  concentration in north hemisphere (Forkel et al., 2016). To better understand their ecological implications under current  
30 climate and environmental changes, one of the main concerns lies in the spatiotemporal aspects of ecosystem photosynthetic productivity in the staple crop that is subject to different methods of field management and anthropogenic interventions, and

underlying physiological mechanisms that are responsible for such spatiotemporal dimensions.

The stability, repeat measurement capability, and landscape to global coverage of remote sensing from satellites have triggered widespread use of such measurements to obtain spatial patterns of biophysical and biochemical variables in studies of land surface and atmospheric process (Richardson et al., 2013). A recent study introducing satellite products as input parameters in flux modelling campaigns carried out in small-size crop land reported that prediction accuracy seems to be pixel-size dependent (Adiku et al., 2006), yielding better prediction if satellite products were applied at finer resolution. Accordingly, attempts made to assimilate those parameters into process-based crop growth models that led to noticeable overestimations and/or underestimations in plant functional traits over a whole growing season have been increasingly concerned (Tenhunen et al., 2009; Lee, 2014; Alton, 2017). Satellite images collected during plant growing seasons have been used to monitor crop growth and to predict yield production. However, their use has been limited by poor revisit times, coarse spatial resolution, and/or cloudy weather. They technically conceal delicate fluctuations of ecosystem productivity tightly associated with per-field ecological conditions on which plants survival and dispersal depend (Seo et al., 2014), which generates considerable spatiotemporal uncertainties in evaluating strength of daily carbon fluxes among micro sites of the same plant function type at principle growth stages. Multi-pragmatic solutions are suggested to develop spatial/temporal data fusions that integrate spatially hierarchical remote sensing networks and *in situ* ground surface observations (Lausch et al., 2016; Pause et al., 2016), aiming to better monitor canopy dynamics and environmental impacts on them.

Of the various means that can aid the understanding of per-field ecological processes, close-range remote sensing technique is a realistically convenient measure that can provide timely temporal information of ecosystem dynamics at high spatial resolution. Recent applications in agronomy studies (Zhang and Kovacs, 2012; Ko et al., 2015; Jeong et al., 2016) have reinforced the feasibility of resolving the research gaps in terms of capturing spatiotemporal aspects of ecosystem photosynthetic productivity at intra- and inter-fields.

To best interpret spatiotemporal variations of ecosystem photosynthetic productivity captured by close-range remote sensing, conventional physiological studies at canopy leaves remain essential (Sinclair and Horie, 1989; Niinemets and Tenhunen, 1997). As leaves are the small and basic units that constitute rice canopy volume, their functioning could change with canopy development and changing habitat conditions (Xue et al., 2016a, b), contributing to fluctuations in strength of seasonal canopy photosynthesis.

Traditional ecophysiology approaches are very limited in comparing neighboring plants and tend to neglect spatial dimensions. Landscape ecology can resolve ecosystem functioning at a broad scale, but tends to be restricted to regional analysis at a higher hierarchical level beyond individual organisms. The central aims of this research are to construct a spatially integrative concept model that assimilates quantitatively abundant data sets collected from a close-range remote sensing system applied at field level and from traditional ecophysiology approaches at plot level, and to capture and interpret effects of different field management practices including nutrient application and water treatments on temporal and spatial

aspects of ecosystem photosynthetic productivity according to their influences on canopy leaf physiology and structure.

The study evaluates two hypotheses. The first posits that the temporal course of canopy carbon gain capacity is driven primarily by leaf area index (LAI) development and solar radiation intensity at the reproductive stage (Xue et al., 2016a; 2017). Canopy leaf physiology is a primary factor that determines efficient use of canopy light use and therefore carbon gain capacity (Sinclair and Horie, 1989). Hence, spatial variability of ecosystem gross primary productivity (GPP) could be concurrently driven by canopy structure (i.e., LAI) and canopy leaf physiology (i.e. light use efficiency,  $LUE_{cabs}$ ). The second hypothesis posits that shifts of planting culture from flooded to rainfed conditions mean that water availability tends to be a primary factor determining ecosystem photosynthetic productivity. Growth of rainfed rice suffers from multiple uncertainties regarding timing/strength of precipitation and uptake of nutrient availability in soil (Kato et al., 2016). Significant changes in leaf and root anatomies, and canopy structure and function in rainfed field could occur (Yoshida, 1981; Steudle, 2000). Greater variations in spatial aspects of ecosystem GPP, LAI and  $LUE_{cabs}$  in rainfed lowland rice than flooded rice are therefore anticipated.

## 2 Materials and Methods

### 2.1 Study site

The field campaign was carried out at the agricultural field station of Chonnam National University, Gwangju, South Korea, which is located at 35°10'N and 126°53'E at an altitude of 33 m (Fig. 1). The mean annual air temperature and precipitation over past two decades averaged 13.8°C and 1400 mm yr<sup>-1</sup>, respectively. The East-Asian monsoon climate prevails from June to October in this region, during which time more than half of the annual precipitation occurs. The top layer of soil is categorized as loam with sand of 388 g kg<sup>-1</sup>, silt of 378 g kg<sup>-1</sup>, clay of 234 g kg<sup>-1</sup>, pH 5.5, organic carbon (C) content of 12.3 g kg<sup>-1</sup>, available phosphorus (P) of 13.1 g kg<sup>-1</sup>, and total nitrogen (N) before fertilization of 1.0 g kg<sup>-1</sup>. Thirty-day-old seedlings of a new breeding line *Oryza sativa* cv. Unkwang (Kim et al., 2006) were transplanted in flooded paddy rice (PD) fields on May 20, 2013 (140 days of year, DOY). N, P, and potassium (K) were mixed at a mass ratio of 11:5:6 to generate fertilizer application rates of 0 kg N ha<sup>-1</sup> (no supplementary fertilizer, plot size ~511 m<sup>2</sup>; low nutrient group), 115 kg N ha<sup>-1</sup> (plot size ~1387 m<sup>2</sup>; normal nutrient group), and 180 kg N ha<sup>-1</sup> (plot size ~511 m<sup>2</sup>; high nutrient group) (Fig. 1). The nutrient treatment groups were isolated by 35 cm-wide cement walls and inserted 1 m into the soil. N-based fertilizer was added to 80% of total N by hand spreading two days before transplanting. The remaining 20% was added at the active tillering phase of the vegetative stage. P-based fertilizer was applied as 100% of the basal dosage. K-based fertilizer was applied as 65% of the basal dosage with the remaining 35% applied during the tillering phase. Seeds of the same rice cultivar were directly sown in an adjacent upland field that was being treated as rainfed rice (RF, ~64 m<sup>2</sup>) on April 22 (112 DOY). The same fertilizer compound containing 115 kg N ha<sup>-1</sup> (PD normal nutrient group) was applied to the rainfed (RF) Unkwang rice field twice, with 80% applied before seeding and the rest applied at the tillering phase. The RF field was not irrigated during the

whole growing season. All field management practices conformed to local planting cultures. The life history of the Unkwang rice is generally aligned to a proposed classification of phenology in temperate rice (Yoshida, 1981), in which the rice spends about 30 days in the vegetative stage after transplanting, 30 days in the reproductive stage, and 30 days in the ripening period.

5 To better understand the physiological mechanisms that may contribute to the spatial patterns of per-field photosynthetic productivity, a pair of experiments involving PD and RF Unkwang rice in a controlled growth chamber at the University of Bayreuth (11°34'N, 49°56'E) were conducted in September 2014. Thirty-day-old seedlings were transplanted into plastic containers with a top diameter of 25.4 cm and a height of 25 cm with similar plant spacing as the planting practice in the 2013 field experiment. The equivalent fertilizer containing 115 kg N ha<sup>-1</sup> was applied two times for both the PD and RF rice,  
10 before transplanting/sowing and at the tillering phase. All plants were then acclimated in the growth chamber to daytime air temperature 30°C, relative humidity 60%, night temperature of 25°C, and light intensity of 900 μmol m<sup>-2</sup> s<sup>-1</sup> (35.64 MJ m<sup>-2</sup> d<sup>-1</sup>). Soil water content (SWC) in the RF rice containers was maintained between 0.2 and 0.4 m<sup>3</sup> m<sup>-3</sup> using soil moisture sensors (EC-5, Decagon, WA, USA).

## 15 **2.2 Field measurements of meteorological factors and SWC**

Meteorological factors including air temperature, relative humidity, wind speed, precipitation, and global radiation were continuously measured with a 2 m high WS-GP1 automatic weather station (AWS) installed at a margin of the RF field (Delta-T Devices Ltd., Cambridge, UK). Weather data were recorded every 5 min, and were averaged and logged every 30 min. Additionally, values of SWC at depths of 10, 30, and 60 cm at three sites in the RF field were continuously measured  
20 every 15 min using the soil moisture sensors. SWC data recorded by the sensors were calibrated by actual SWC measurements conducted in the laboratory with the same soil. SWC was then converted to soil water potential ( $\psi_s$ ) with standard soil-water retention curves of Van Genuchten (1980) as modified by Xue et al. (2016b).

## **2.3 Field measurements of diurnal courses of leaf and canopy carbon dioxide (CO<sub>2</sub>) exchange**

25 Diurnal gas exchange and chlorophyll fluorescence measurements in fully expanded uppermost, second, third, and fourth leaves of canopy profiles for the PD high nutrient group were conducted on day after transplanting (DAT) 57 and 73 (197 and 213 DOY, respectively) using a GFS-3000 portable gas exchange and PAM Fluorometer 3050-F chlorophyll fluorescence system (Heinz Walz GmbH, Effeltrich, Germany) to track ambient environmental conditions external to the leaf cuvette. Repeated measurements of diurnal course of leaf gas exchange were carried out in the uppermost leaves in the PD  
30 low nutrient group on 171, 172, 179, 180 and 199 DOY (31, 32, 39, 40 and 59 DAT, respectively), in the PD normal nutrient group on 175, 177, 195 and 211 DOY (35, 37, 55, and 71 DAT, respectively), in the PD high nutrient group on 170 and 178 DOY (30 and 38 DAT, respectively), and in the RF rice on 157, 181, 201, 205, 222, 223, 227, 231, 235 and 238 DOY. The

mid portions of two or three leaves were enclosed in the leaf chamber from sunrise to sunset. The photosynthetic rate and momentary micrometeorological factors just above the plant canopies were recorded every 5 min, and automatic calibration was done by a user-defined program every 15 min. Leaf light use efficiency based on incident photosynthetically active radiation (PAR;  $LUE_{leaf}$ ) was estimated using photosynthesis data recorded at incident PAR < 200  $\mu\text{mol m}^{-2} \text{s}^{-1}$ .

5 The diurnal course of canopy gas exchange was conducted in a custom-built transparent chamber (L 39.5 × W 39.5 × H 50.5 cm) used for net ecosystem gas exchange (NEE) measurement and in an opaque chamber (L 39.5 × W 39.5 × H 50.5 cm) designed for ecosystem respiration ( $R_{eco}$ ) measurement (Lindner et al., 2016; Xue et al., 2016a) on ~ 159, 167, 175, 200, 220, and 240 DOY. Measurements on 240 DOY were only available at PD normal group and RF rice. Four white frames, with three filled with healthy plants and one set on bare soil without any plants, were randomly deployed in each PD nutrient  
10 group and in the RF field (Lindner et al., 2016). They were inserted into the soil at a depth of 10 cm before transplanting/sowing to block air leak at the interface between the frame and soil surface, and kept in the fields until plants were harvested. Diurnal courses of NEE and  $R_{eco}$  per square meter were monitored each hour from sunrise to sunset. Differences of air temperature between the inside and outside of the chamber were controlled to < 1°C using ice packs positioned at the back side of the chamber to avoid shadow effects of the ice packs. Incident PAR inside the transparent  
15 chamber was measured with a LI-190 quantum sensor (LI-COR, Lincoln, NB, USA). GPP estimation was derived using the equation  $GPP = -NEE + R_{eco}$  (1)

where  $R_{eco}$  rates at times when NEE rates were measured were determined from an exponential regression with respect to chamber air temperature ( $T_{air}$ ) (Xue et al., 2016a). A classical hyperbolic light response function was fit to estimate gross primary productivity (GPP, sum of NEE and  $R_{eco}$ ), yielding canopy light use efficiency ( $LUE_{cint}$ ) defined as the initial slope  
20 of the response and an estimate of maximum GPP rate ( $GPP_{max}$ ) at a relatively infinite high PAR level (Lindner et al., 2016).

## 2.4 Field measurements of canopy reflectance

Reflectance measurements were carried out with a model MSR4 hand-held multispectral radiometer with 4 spectral bands (Cropscan Inc., Rochester, MN, USA). Incident radiation was measured with a view-angle of 180°, and that reflected by rice  
25 canopies was measured with a view angle of 28°. Weekly reflectance measurements conducted around plants sampled for canopy gas exchange was repeated six times in each PD nutrient treatment and three times in RF field at solar noon midday when sky was clear without clouds. Normalized difference vegetation index (NDVI) was a product of differences of reflectance in the field of which red (the central band-width of 660.9 nm) and near infrared (the central band-width of 813.2 nm). Estimations of ground-based NDVI were made on the days when canopy gas exchange measurements (Xue et al.,  
30 2016a).

Spectral reflectance at fine spatial resolution < 10 cm for the whole PD field and RF field was measured on June 21 (172 DOY, vegetative stage), July 11 (192 DOY, early reproductive stage), July 25 (206 DOY, middle reproductive stage),

August 08 (220 DOY, early ripening stage), and August 21 (233 DOY, middle ripening stage) using an unmanned aerial vehicle (UAV) system (details of the construction of the UAV system are given in Jeong et al., 2016). The UAV images were acquired at approximately local noon  $\pm$  30 min (i.e., KST 12:10 to 13:10) when there were clear skies or homogenous cloudy skies. The camera exposure was set at its minimum value ( $0.5 \mu\text{m s}^{-1}$ ) under clear sky conditions and ranged between 1.0 to 2.0  $\mu\text{m/s}$  under homogenous fine cloudy skies to obtain the best images. When recording UAV images, the mini-MCA6 multispectral camera (Tetracam Inc., Chatsworth, CA, USA) loaded on board the UAV, which detected ground reflectance with the wavelength bands of 450, 550, 650, 800, 830, and 880 nm, was always positioned vertically to the ground.

Pseudo invariant targets (PITs) at three different colors (white, black, and gray) were placed adjacent to the PD field prior to each UAV flight. At-surface reflectance values of two selected waveband at 800 and 650 nm from those PITs were obtained using the other hand-held spectrometer (MSR16 with 16 wave bands; CropsScan). Linear regression correlations were made between mini-MCA6 digital values and the reflectance from the MSR16 at each corresponding waveband, with a correlation coefficient ranging from 0.98 to 0.99 (detailed descriptions are provided in detail Ko et al., 2015 and Jeong et al., 2016). Camera measurements were then calibrated based on at-surface measurements by applying each linear regression to the field imagery. Evaluation of the radiometric corrected UAV images was carried out by comparisons with measurements of 16 ground point reflectance values, which comprised 12 points in paddy fields and four points in bright cement, dark asphalt, bare soil, and tilled soil. There were close correspondences between reflectance derived from the radiometric corrected UAV images and those measured at the ground over all UAV flight dates, with correction efficiency (E) up to 0.99 and root mean square error (RMSE) ranging between 0.01 and 0.05 (Appendices, Fig. A1). Radiometric calibrated reflectance at red, green, and blue bands (450, 550, and 650 nm, respectively) on June 21/172 DOY (clear sky) when there had low density vegetation canopies with large exposure of water surface were consistently lower than at-surface measurements (Appendices, Fig. A1a), resulting in risks of overestimating field NDVI (a product of differences in reflectance of red 650 nm and near infrared 800 nm) thereby biased estimation of  $\text{GPP}_{\text{day}}$  and  $\text{LUE}_{\text{cabs}}$ . For the sake of brevity the radiometric calibrated camera reflectance of red waveband on June 21/172 DOY were recalibrated by a linear regression line against at-surface measurements (Appendices, Fig. A1a,  $\rho_{\text{red\_ground meas.}} = 1.761 * \rho_{\text{red\_UAV}}$ ,  $R^2 = 0.76$ ,  $p < 0.01$ ).

## 2.5 Measurements of leaf area, N content, and leaf water potential

After conducting leaf and canopy gas exchange measurements, leaf samples were collected to estimate leaf area and N content. Three bundles consisting of 15 plants from each treatment were harvested on 26, 33, 54, 72, and 86 DAT, and total plant area (leaf and stem) was determined with a LI-3100 leaf area meter (LI-COR, Lincoln, Nebraska, USA). Leaves of PD and RF rice grown in the growth chamber were harvested on 33 and 55 DAT. All plant materials were dried at  $\sim 60^\circ\text{C}$  for at least two days before measurements of leaf nitrogen content. Leaf nitrogen content was quantified using a C:N analyzer (Model 1500, Carlo Erba Instruments, Milan, Italy). Weekly measurements of LAI were conducted before 220 DOY using a

LI-2000 portable plant canopy analyzer (LI-COR) at the same locations where at-surface canopy reflectance values were sampled using the CropScan. These were calibrated using those obtained by the harvest method. LAI measurements on 240 DOY were supplemented referring to Lindner et al. (2016). On the same measuring times as leaf gas exchange was conducted in August, daily courses of leaf water potential in RF rice were collected with a pressure chamber (PMS Instruments, Corvallis, OR, USA). Healthy and well-expanded leaves in plant canopies were enclosed in a plastic bag before cutting and rapidly transferred into a pressure chamber.

## 2.6 Data assimilation

Assessment of influences of field management practices (i.e., nutrient and water availability) in crop photosynthetic traits and interpretation of the presence of such spatiotemporal fluctuations require development of a data assimilation process capable of linking *in situ* observations of leaf and canopy photosynthetic traits and vegetation information at field level. Here, a simple concept model aiming to resolve the objective stated above was developed, up-scaling application of the classical light response model of leaf photosynthesis to canopy and field dimensions using hyperspectral reflectance of ground surface collected at corresponding scales in Eqs 2-8:

$$LUE_{c_{int}} = a_1 \times LAI + b_1 \quad (2)$$

$$GPP_{max} = a_2 \times LAI + b_2 \quad (3)$$

$$LAI = a_3 \times NDVI^2 + b_3 \times NDVI + c_3 \quad (4)$$

$$GPP_{day} = \sum_{j=1}^N \frac{LUE_{c_{int}} \times GPP_{max} \times PAR_j}{LUE_{c_{int}} \times PAR_j + GPP_{max}} \quad (5)$$

$$fAPAR = fAPAR_{max} \left[ 1 - \left( \frac{NDVI_{max} - NDVI}{NDVI_{max} - NDVI_{min}} \right)^{\epsilon} \right] \quad (6)$$

$$fAPAR = a_4 \times NDVI + b_4 \quad (7)$$

$$LUE_{c_{abs}} = \frac{GPP_{day}}{fAPAR \times PAR_{day}} \quad (8)$$

where, in Eq. 2,  $a_1$  and  $b_1$  are regression coefficients for  $LUE_{c_{int}}$ -LAI correlation based on plot measurements (Table 1). In Eq. 3,  $a_2$  and  $b_2$  are regression coefficients for  $GPP_{max}$ -LAI correlation based on plot measurements (Table 1), consistent with previous reports (Lindner et al., 2015; 2016). In Eq. 4,  $a_3$ ,  $b_3$ , and  $c_3$  are regression coefficients for LAI-NDVI mathematic correlation across all data sets based on plot measurements (Table 1), which is consistent with a 3-year-report in rice in terms of LAI-NDVI trajectory by Jo et al. (2015). In Eq. 5  $GPP_{day}$  is daily integrated GPP per pixel, a product of light use efficiency based on incident PAR ( $LUE_{c_{int}}$ ), maximum GPP rate ( $GPP_{max}$ ) and half-hourly averaged  $PAR_j$  obtained from the

AWS.  $N$  is number of observations of incident PAR during daytime. In Eq. 6,  $fAPAR_{max}$ ,  $NDVI_{max}$ ,  $NDVI_{min}$ , and  $\epsilon$  are maximum fraction of absorbed photosynthetically active radiation, maximum NDVI, and minimum NDVI of fAPAR-NDVI correlation and its coefficient in green crop canopies, referring to Table 1 and Xue et al. (2016a).  $a_4$  and  $b_4$  in Eq. 7 are regression coefficients for fAPAR-NDVI correlation in senescing canopies (Table 1, referring to the stage after middle ripening stage in rice), derived from Inoue et al. (2008). Light use efficiency based on daily canopy light interception per pixel ( $LUE_{cabs}$ ) in Eq. 8 is a product of  $GPP_{day}$ ,  $fAPAR$  and  $PAR_{day}$  (daily integrated incident PAR).

## 2.7 Geospatial statistic

Regionalized variable theory takes the differences between pairs of values separated by a certain quantity, usually distance, commonly expressed as variance (Vieira et al., 1983). A widely used geostatistical analysis to depict the spatial correlation structure of observations in space such as field soil fertility and temperature as well as other ecological processes is semi-variogram (Pierson and Wight, 1991; Loescher et al., 2014), given by:

$$\gamma(h) = \frac{1}{2N(h)} \sum_{j=1}^{N(h)} [z(x_j) - z(x_j + h)]^2 \quad (9)$$

$$CV_{sill} = \frac{\sqrt{2 \times \gamma_{sill}}}{Mean} \quad (10)$$

where  $z(x_j)$ ,  $j=1, 2, \dots, n$  denotes the set of  $GPP_{day}/LUE_{cabs}$  data;  $x_j$  is the vector of spatial coordinates of the  $j$ th observation;  $h$  is the pixel distance of sample values (lag);  $N(h)$  is number of pairs of values separated by lag, and  $\gamma(h)$  is semi-variance for the lag.  $CV_{sill}$  is coefficient of variance using the sill and value of the mean for estimation. The semi-variogram simply describes how the variance of observations changes with the distance in a given direction or it is averaged over all directions. The averaged semi-variance over all directions used in this research looked for an overall pattern between proximity and the similarity of pixel values, providing a single value that describes the spatial autocorrelation of the dataset as a whole. Most often, semi-variance values increase until they reach a maximum approximately equal to the sample variance of the measured variable known as the “sill”. The lag at which the sill is reached is known as the “range”. Beyond the range, values of observations are no longer spatially correlated. Sill values refract magnitude of spatial variability of variables in the field. Several simple functions are commonly used to model semi-variogram, which must be proven to be positive definite. An exponential rise to maximum function to approximate a spherical model was used to extrapolate the value of the sill, listed below:

$$\gamma(h) = a \times (1 - \exp(-b \times h)) \quad (11)$$

where  $b$  is the sill and  $a$  is the nugget value.

## 2.8 Statistical analysis



Descriptive statistics of the data included computation of the sample mean, maximum (max.), and coefficient of variation ( $CV_{\text{traditional}}$ ). Nonlinear least square method for GPP/PAR curves was executed using R software (R 3.2.3, R Development Core Team, Austria). The data assimilation that links remote sensing data and ecophysiological measurements and geostatistical analyses were processed using IDL 8.0 /ENVI 4.8 software (EXELIS Inc., Rochester, NY, USA).

5

### 3 Results

#### 3.1 Seasonal courses of at-surface NDVI, LAI, $LUE_{\text{cint}}$ , and $GPP_{\text{max}}$

ANOVA analysis for NDVI indicated that NDVI values measured around 170 DOY between the PD normal and high nutrient groups were analogous but significantly higher than the low group at 0.05 level (Fig. 2a,  $p = 0.026$ ). There was not a statistical difference at the 0.05 significance level between the RF and PD low group. No significant discrepancy existed between PD normal and high groups over the growing seasons ( $p > 0.1$ ). Higher NDVI at the PD fertilizer addition groups were evident during vegetative stage and early in the reproductive stage before 200 DOY ( $p = 0.06$ ). Such a clear discrepancy in NDVI between the PD low and fertilization groups and RF rice was not evident after 210 DOY ( $p = 0.10$ ). NDVI values advanced to decline after plants in the PD field arrived at maximum levels around 210 DOY. However, the RF rice remained green around 240 DOY with 22.5% higher LAI when plants in the PD field started senescence (Fig. 2b), which resulted in a relatively higher at-surface NDVI that was also captured by field images of NDVI derived from the UAV system. LAI in the PD normal nutrient group was similar to those of the high group at the corresponding growth stages (Fig. 2b), with a seasonal course of NDVI for the normal/high groups. Enhanced LAI development with addition of fertilizer was evident after 180 DOY and N-related effects persisted until around 210 DOY, consistent with NDVI development among PD nutrient groups. LAI in the RF rice ranged between the PD low and fertilization groups, while it remained higher on 240 DOY. Regression analysis for the NDVI-LAI relationship in grouped datasets showed a common trajectory across PD nutrient groups and RF rice (Fig. 3a,  $R^2 = 0.95$ ,  $p < 0.001$ ).

A curvilinear response of GPP rate to incident PAR fit well with the classical light response model at each measuring date (data not shown), as previously reported (Lindner et al., 2016). Resulting  $LUE_{\text{cint}}$  on 160 DOY was approximately  $0.01 \mu\text{mol CO}_2 \mu\text{mol}^{-1} \text{PAR}_{\text{incident}}$  crossing the PD nutrient groups and RF rice, and rapidly increased after 180 DOY (Fig. 2c). Differences in  $LUE_{\text{cint}}$  among the PD nutrient groups were relatively small ( $< 20\%$ ) on the corresponding dates. Nevertheless, the RF rice presented dramatically high  $LUE_{\text{cint}}$  as compared to the PD rice from 180 DOY to the end of the growing season, showing the highest values at  $0.11 \mu\text{mol CO}_2 \mu\text{mol}^{-1}$  and  $0.05 \mu\text{mol CO}_2 \mu\text{mol}^{-1}$  in RF and PD rice, respectively. Generally speaking, PD rice at the fertilization groups had dramatically higher  $GPP_{\text{max}}$ , with a maximum level of  $51.60 \mu\text{mol CO}_2 \text{m}^{-2} \text{s}^{-1}$  compared to  $38.90 \mu\text{mol CO}_2 \text{m}^{-2} \text{s}^{-1}$  of the low group (Fig. 2d). Maximum  $GPP_{\text{max}}$  in the RF rice was analogous to that of PD rice, and remained higher on 240 DOY, which was ascribed to green LAI (Fig. 2b). Similarities in photosynthetic traits in terms of NDVI, LAI,  $GPP_{\text{max}}$ , and  $LUE_{\text{cint}}$  between the normal and high nutrient groups at the corresponding growth stages

were evident. Hence, comparisons in those parameters stated below refer to the low and normal groups.

Relatively low LAI in RF rice during the reproductive stage but higher  $LUE_{cint}$  than PD at the same growing stage resulted in a distinction regarding LAI- $LUE_{cint}$  correlation associated with slope (Fig. 3c;  $R^2 = 0.74$ ,  $p = 0.02$  in RF,  $R^2 = 0.85$ ,  $p < 0.0001$  in PD,  $F = 22.16$ ,  $p = 1.398e-05$ , see Table 1). A common linear regression for LAI- $GPP_{max}$  correlation that interpreted 88% of variations in  $GPP_{max}$  across the PD nutrient groups and RF rice was evident (Fig. 3b;  $R^2 = 0.88$ ,  $p < 0.0001$ ). Canopy leaf nitrogen content ( $N_m$ , %) collected in the field and controlled growth chamber were significantly higher in RF rice after 180 DOY (Figs. 4a, b;  $p < 0.05$ ). Light use efficiency at leaf level ( $LUE_{leaf}$ ) was positively correlated to  $N_m$  (Fig. 4b;  $R^2 = 0.65$ ,  $p = 0.0007$ ). This implied that the improved  $LUE_{cint}$  in RF rice observed after 180 DOY could be related to its strengthened capacity of N accumulation in canopy leaves.

10

### 3.2 Field mapping of $GPP_{day}$ and $LUE_{cabs}$

Field maps of  $GPP_{day}$  and  $LUE_{cabs}$  at principle growth stages (Figs. 5 and 6) clearly showed that seasonal change of within-field  $GPP_{day}$  at each nutrient group could be quantitatively mapped using three types of colors (yellow, blue, and red) corresponding to low, medium, and high numerical values, respectively. Pink pixels and bright red pixels were respectively observed in PD and RF rice on the August 08 measuring date (220 DOY) during which time most rice plants proceeded to ripen, showing the highest LAI. However, color distribution in space at specific growth stage within nutrient groups, especially in normal and low groups, on July 11 (192 DOY) and August 21 (223 DOY) seemed to be uneven (Figs. 5b, d). Furthermore, uneven distribution in RF rice was intensified as compared with PD rice on the corresponding dates. For  $LUE_{cabs}$ , appearance of greater spatial variability in color distribution was seen at early growth stage in both PD and RF rice (Figs. 6a, e), which seemed to contrast with spatial aspects of  $GPP_{day}$  over the growing season.  $LUE_{cabs}$  distributions in space over the reproductive stage (July 11, 192 DOY) tend to approach homogeneity in either PD nutrient groups or RF rice (Figs. 6b, c, f, g).

15

20

30

Descriptive statistics including Mean, Max., and  $CV_{traditional}$  in  $GPP_{day}$  and  $LUE_{cabs}$  described their mean, maximum values at field scale and within-field variation of mean across the growing season (Table 2). Max.  $GPP_{day}$  differed significantly between normal ( $7.29 \text{ g C m}^{-2} \text{ d}^{-1}$ ) and low ( $3.78 \text{ g C m}^{-2} \text{ d}^{-1}$ ) nutrient groups 4 weeks after transplantation, which was clearly apparent in the visual display of pixel  $GPP_{day}$  as well (Figs. 5a, d). Nevertheless, field mean values among the three nutrient groups were close to one another. The 35.63% enhanced field mean of  $GPP_{day}$  in normal groups compared to the low group appeared on June 11 (192 DOY), and the large discrepancy persisted until the end of the growing season. Except for the early growth stage, the three nutrient groups showed similar values in maximum  $GPP_{day}$  which reached  $12.49 \text{ g C m}^{-2} \text{ d}^{-1}$  for the normal group around August 08 (220 DOY) and then declined with senescence. Maximum  $GPP_{day}$  predicted using a light use efficiency model in our previous report (Xue et al., 2016a) tended to be higher as compared with the one shown here for the normal nutrient group, which is thought to be due to model sensitivity to changes in ambient light

environment.

Rice plants grown in the RF field showed significantly higher mean and maximum  $GPP_{day}$  than PD rice at respective growth stages (Table 2). However,  $CV_{traditional}$  in RF rice was about two times higher than the PD normal and low nutrient groups several weeks after transplantation. The PD normal nutrient group displayed a higher  $CV_{traditional}$  quantified on June 21 (172 DOY) than the high and low groups. Differences in  $CV_{traditional}$  among PD nutrient groups disappeared over time, consistent with the color display in field map of  $GPP_{day}$  in Figs. 5c and d. The results suggest that although addition of fertilizer in the traditional way can promote increment of field average  $GPP_{day}$ , it dramatically strengthens field variations of  $GPP_{day}$  during the early growth stage in the paddy field setting. As we expected, the change in planting culture from paddy to rainfed promoted the enhancement of field variations in mean of field  $GPP_{day}$  probably due to the rising risk of soil water availability when prolonged drought events occur.

$LUE_{cabs}$  appeared to be higher early at the growth stage, rapidly declined after plant growth and development advanced to reproductive stage, and gradually decreased to approx. 0.52 and 0.81 g C MJ<sup>-1</sup> at senescence stage in PD and RF rice, respectively (Table 2). RF rice had clearly high values of average  $LUE_{cabs}$  as compared to PD by 20.93%, 35.18%, 26.43%, and 35.80% on July 11, July 25, August 08 and August 21, respectively, apart from June 21, when PD and RF showed similar  $LUE_{cabs}$  of around 1.4 g C MJ<sup>-1</sup>. Enhanced  $LUE_{cabs}$  in RF rice over the growing season was likely ascribed to higher leaf nitrogen content shown in Fig. 4a.

Seasonal courses of  $CV_{traditional}$  of  $LUE_{cabs}$  among PD nutrient groups exerted a similar tendency, assembling mean of  $LUE_{cabs}$  (Table 2).  $CV_{traditional}$  at normal and high nutrient groups were analogous over time while appearing to be higher on June 21 (172 DOY) and July 11 (192 DOY) by approximately 62% and 50%, respectively, than the low nutrient group. Interestingly,  $CV_{traditional}$  in the fertilization groups (normal and high groups) displayed approximately 53% and 30% higher values, respectively, than RF rice at the early growth stage (June 21, 172 DOY and July 11, 192 DOY). Similar to drought impacts in amplifying  $CV_{traditional}$  in  $GPP_{day}$  on August 21 (233 DOY) in RF rice, amplified  $CV_{traditional}$  in  $LUE_{cabs}$  was also observed. Lower  $CV_{traditional}$  and similarities in  $LUE_{cabs}$  over field space on July 25 (206 DOY) and August 08 (220 DOY) corresponded well to the field map of  $LUE_{cabs}$  at corresponding dates, meaning that field mapping in proper ways also could visibly deliver distribution information of ecosystem photosynthetic traits in space.

### 3.3 Semi-variograms of $GPP_{day}$ , $LUE_{cabs}$ , and LAI

Semi-variogram analysis is one of widely-used geostatistical parameters to quantitatively evaluate spatial variation. Sill values were derived from exponential rise to maximum function, which fit the values of semi-variogram at each nutrient and/or water treatment ( $R^2 > 0.83$ ,  $p < 0.01$ ). Values of  $CV_{sill}$  in  $GPP_{day}$  were significantly and positively correlated to  $CV_{traditional}$  ( $R^2 = 0.83$ ,  $p < 0.001$ ; Fig. 7a), demonstrating that the semi-variogram accurately captured patterns of spatial variability in those ecophysiological traits among nutrient treatments and RF rice. Estimates of  $CV_{sill}$  among nutrient groups

were generally close to those of  $CV_{\text{traditional}}$ , approaching 1:1 line (Fig. 7a). However,  $CV_{\text{traditional}}$  values in RF rice were commonly lower by approximately 20% than  $CV_{\text{sill}}$  at the principle growth stages. This occurred because of the traditional method of calculating CV does not account for spatial correlation in data, suggesting that spatial heterogeneity in RF field associated with water availability and resulting crop growth was greater as compared to PD rice. This was also proven by average  $CV_{\text{sill}}$  in RF that was greater by about 50% than that of PD rice averaged across the nutrient groups (Table 3).

A significantly positive correlation between  $CV_{\text{sill}}$  and  $CV_{\text{traditional}}$  was observed in  $LUE_{\text{cabs}}$  as well ( $R^2 = 0.89$ ,  $p < 0.001$ ; Fig. 7b). All of  $CV_{\text{sill}}$  sampled across PD nutrient groups and RF rice resided at the right side of the 1:1 line, being higher than  $CV_{\text{traditional}}$  but analogous between PD and RF rice, which was different from the significant difference in  $CV_{\text{sill}}$  of  $GPP_{\text{day}}$  between PD and RF rice shown in Fig. 7a. It was also evident by average  $CV_{\text{sill}}$  of 11.66 in RF rice that was close to the value of 14.37 of PD rice averaged across nutrient groups (Table 3), meaning that spatial variability of  $LUE_{\text{cabs}}$  in PD rice exerted great amplitude that tended to be similar to RF rice. A positively linear correlation between  $CV_{\text{sill}}$  and  $CV_{\text{traditional}}$  was evident in LAI ( $R^2 = 0.80$ ,  $p < 0.001$ ; Fig. 7c). Data points collected over PD nutrient groups oscillated closely around the 1:1 line; an exception was observed in RF rice, which reassembled the phenomena observed in  $CV_{\text{sill}}-CV_{\text{traditional}}$  for  $GPP_{\text{day}}$  but differs from that for  $LUE_{\text{cabs}}$ . Given the tight correlation between  $CV_{\text{sill}}$  and sill values, sill instead of  $CV_{\text{sill}}$  was used in spatial analysis for  $GPP_{\text{day}}$  and  $LUE_{\text{cabs}}$  as discussed below.

### 3.4 Spatial patterns of $GPP_{\text{day}}$ , $LUE_{\text{cabs}}$ , and LAI

Seasonal development in sill values of  $GPP_{\text{day}}$  exhibited similar tendency across PD nutrient groups and RF rice, with an increase from the vegetative stage to the early reproductive stage followed by a decline (Table 3, upper part). Paired t-test across the range of DOY showed that difference of sill in RF rice was significantly different from PD nutrient groups ( $p < 0.05$ ). Nevertheless, significant differences were not repeatedly observed among PD nutrient groups. Early in the growth season (i.e., June 21, 172 DOY and especially on July 11, 192 DOY), normal and high nutrient groups had relatively high sill by an average of 43.90% as compared to the low nutrient group, suggesting that fertilizer addition could contribute to spatial variability of  $GPP_{\text{day}}$ , which conforms to differences in  $CV_{\text{traditional}}$  (Table 2). As expected, sill of RF rice measured on August 21 (233 DOY) increased in contrast to observed seasonal tendency of sill that was supposed to decline, due to occurrence of a prolonged drought event from August 11 to 20, during which leaf water potential around solar noon declined to -2.0 MPa and severe leaf rolling occurred (data not shown). Significant impacts by drought on  $GPP_{\text{day}}$  were observed. Seasonal courses of sill in LAI across PD nutrient groups and RF rice were similar to those of  $GPP_{\text{day}}$  (Table 3, middle part). Sills of LAI in RF rice were generally higher than PD rice at corresponding growth stages.

Sill of  $LUE_{\text{cabs}}$  showed a seasonal trend that was similar to  $GPP_{\text{day}}$  (Table 3, lower part). The prolonged drought event occurring before August 21 (233 DOY) contributed to spatial variability in RF rice as indicated by greater sill of 0.0142 compared with 0.0032 on August 08 (220 DOY). ANOVA analysis indicated no difference at the 0.05 significance level

among the three PD nutrient groups over the growing season ( $p = 0.67$ ), whereas the mean sill value of 0.4492 on June 21 (172 DOY) was improved by 93.32% for normal and high nutrient groups compared to the value of 0.03 for the low nutrient group, resembling comparisons in sill of  $GPP_{day}$  and field maps shown in Fig. 6a. The results implied that fertilizer addition can enhance spatial variability of  $LUE_{cabs}$  especially early the growing season. Interestingly, at early growth stage, especially on June 21 (172 DOY) and July 11 (192 DOY), PD nutrient addition groups had average sill values that were 85% higher as compared to RF rice. Thereafter the values of RF rice became greater, meaning that spatial variability of  $LUE_{cabs}$  in PD rice amplified by field nutrient application could be even greater than RF rice, in contrast with aforementioned  $GPP_{day}$  spatial variability between PD and RF rice.

### 10 3.5 Spatial correlation for $GPP_{day}$ , $LUE_{cabs}$ , and LAI

$LUE_{cabs}$  was calculated by Eq. 8 consisting of  $GPP_{day}$  and  $fAPR$  variables, meaning that spatial influences of  $LUE_{cabs}$  may influence  $GPP_{day}$ . Sill values or  $CV_{sill}$  for  $GPP_{day}$  and  $LUE_{cabs}$  were not significantly correlated to one another when all data sets were grouped across PD nutrient groups and RF rice over growing seasons ( $R^2 < 0.14$ ,  $p > 0.01$ ). Significantly positive correlations were found for  $sill_{GPP_{day}}-sill_{LAI}$  in PD nutrient groups (Fig. 7d,  $R^2 = 0.36$ ;  $p = 0.012$ ) and in RF rice (Fig. 7d,  $R^2 = 0.85$ ;  $p = 0.015$ ), suggesting that the primary factor that mediates  $GPP_{day}$  spatial variation in PD nutrient groups, especially in RF rice, was LAI development.

### 3.6 Implied ecological implications of canopy leaf physiology

Ecological implications of canopy leaf physiology (i.e.,  $LUE_{cabs}$ ) in monitoring of spatial variation and strength of  $GPP_{day}$  for the same plant function type (PD and RF rice) were analyzed using scenario analysis. The analysis applied  $LUE_{cabs}$  of PD rice on August 08 (220 DOY) in the estimation of RF rice  $GPP_{day}$  on the same date, yielding comparisons in the field map of  $GPP_{day}$  (Figs. 8a, b) and quantitative assessment (Fig. 8c). The field map of predicted  $GPP_{day}$  using PD- $LUE_{cabs}$  indicated blue as the prevailing color as compared to the prevailing red color in the field map of the initial estimation, indicating a significant underestimation of  $GPP_{day}$ , especially at the sites showing high LAI (Fig. 8c). The results suggest that delicate variations in canopy leaf physiology among the same plant function type across various habitat conditions are vital.

## 4 Discussion

A series of successive effects regarding rice growth and environment perspectives from the leaf to the ecosystem have been revealed by our research group, with the aim of clarifying the physiological mechanisms responsible for optimal carbon gain and water use at the leaf level as well as their plastic acclimation to changing ambient environments (Xue et al., 2016b and c), discerning the roles of canopy structure and function in determining canopy carbon gain in individual organisms in different field management conditions and anthropogenic interventions (Lindner et al., 2016; Xue et al., 2016a), increasing the

understanding of the influences of climate change, phenology, and rice ecosystem photosynthetic productivity (Xue et al., 2017), and to facilitate a discussion of the ecological implications of life history of rice crops in controlling regional carbon fluxes in the agriculture landscape (Lindner et al., 2015). There are large fluctuations of ecosystem photosynthetic productivity in different geographic sites. However, the fluctuations have not been statistically correlated to the rate of N application, which does significantly contribute to rice growth at individual level. This is thought to be due to various factors including inter- and intra-field variations of ecosystem photosynthetic productivity. This highlights the need for field/microsite directed research to gain new insights into how water and N availability affect photosynthetic productivity at individual and microsite scales.

#### 10 **4.1 Feasible application of the UAV system to capture spatiotemporal variations of GPP<sub>day</sub>**

Applications of close-range remote sensing in studies of vegetation dynamics regarding plant growth and phenology have been increasingly explored, partially due to small-scale pixel-to-pixel detection that eliminates the averaging involved in larger pixels of satellite products. It compensates for the regional observation of satellite remote sensing systems. UAV-based applications in agronomical studies has been tested, and include evaluation of spatial variability of soil N content in a winter wheat field (Cao et al., 2012), detection of canopy N status in irrigated maize (Bausch and Khosla, 2010), and mapping of cereal yield using field vegetation indices (Fisher et al., 2009; Swain et al., 2010; Tubaña et al., 2012; Zhang and Kovacs, 2012) with rice growth and yield included (Ko et al., 2015). Recent attempts were made to apply narrow-band multispectral imagery derived at the plot level in monitoring of whole field C content of lucerne plants (Wehrhan et al., 2016). Furthermore, an applicable crop information delivery system tested in rice ecosystems by Ko et al. (2015) and Jeong et al. (2016), which took several valuable high spatial resolution vegetation indices into account, captured delicate changes in crop growth and yield among the pixels. In this research, diagnostic information derived from high spatial resolution images could be strongly linked to canopy biophysical traits in PD and RF rice, allowing seasonally zonal maps of GPP<sub>day</sub> and LUE<sub>cabs</sub> to be made (Fig. 5 and 6), and assisting in the evaluation of spatial variation of those functional traits.

Practical application of the UAV technique in the field requires a number of procedural steps. They include image pre-processing, image interpretation, and data extraction. Integration of the data with agronomic data in expert systems still needs to be developed and improved before end products of remote sensing applications can be germane for decision-making (Zhang and Kovacs, 2012). An empirical calibration method adopting spectral reflectance from three types of PITs was applied to process radiometric correction after being calibrated using accessible UAV images on each measuring date. Although calibrated UAV reflectance and at-surface measurements usually closely corresponded during the middle and late growing seasons, the empirical calibration tended to underestimate ground reflectance especially in red reflectance at the early growth stage. This was probably due to water scattering effects. The UAV flight schedule that is always scheduled at solar noon may not be the best option to obtain a close correspondence between camera reflectance and ground surface

measurements at the early growth stage. Another empirical regression linking calibrated UAV reflectance and plot measurements was applied instead of considering complex mechanisms of light scattering in the area of physical category. The methods used to recalibrate UAV images on June 21 (172 DOY) may yield biased estimations of field reflectance due to limited number of ground reflectance swatches that were deployed in the limited space. Leaves of plants grown at fertilization addition conditions had enhanced N content at the early growth stage, which directly contributes to greater LUE<sub>cabs</sub> (Sinclair and Horie, 1989; Xue et al., 2017). In contrast, LUE<sub>cabs</sub> in the normal and high nutrient groups, where plants accumulated more N in leaves on June 21 (Fig. 4a) calibrated on the basis of recalibrated UAV reflectance, had an average value that was higher as compared to low nutrient group (Table 2), which implies the pragmatic feasibility of adopting recalibration routine to acquire correct UAV products.

The data assimilation concept that integrates traditional physiology approaches at plot level and close-range remote sensing information requires reliable establishments regarding correlations between ground surface measurements of VIs and LAI, LAI and LUE<sub>cint</sub>, and GPP<sub>max</sub>. Reliable relationships between those biophysical traits were inferred across PD nutrient groups and RF rice (Fig. 3). Nevertheless, data concerning LAI-LUE<sub>cint</sub> correlation in RF rice were limited mainly due to the difficulty in physically performing the measurements of diurnal courses of leaf and canopy gas exchange and measurements of other plant parameters in PD nutrient groups and RF rice. Supplementary data sets in terms of LAI-LUE<sub>cint</sub> correlation in RF rice, as well as other main cops will be conducted as the technical barriers are overcome.

#### **4.2 Spatial variability of photosynthetic trait in the RF field is not always greater than in the PD field**

The burgeoning global population continues to increase the demand for water and food staples including rice. The expansion of rice planting to include different geographic sites, particularly in regions lacking the capability of irrigation and/or flooding of crop fields, and the looming specter of water scarcity in the coming decades in regions that now feature flooding of crop fields is increasing the concerns of how water availability in RF fields could influence spatiotemporal variations of ecosystem photosynthetic productivity as compared to PD fields (Serraj et al., 2008). In the present study, spatial variations of GPP<sub>day</sub> and LAI in RF field were amplified compared to PD nutrient groups at corresponding growth stages (Table 3). However, spatial variation of LUE<sub>cabs</sub> at the early growth stage (June 21, 172 DOY and July 11, 192 DOY) in the PD fertilization groups was significantly greater than RF at the same times, suggesting that spatial variability of photosynthetic trait in RF field does not always exceed that of PD fields depending on nutrient availability. Furthermore, nutrient addition at the early growth stage could amplify spatial heterogeneity of GPP<sub>day</sub> and LUE<sub>cabs</sub> in PD field while, such nutritional effects dismissed at reproductive and ripening stages.

#### **4.3 Implied ecological implications of field niche in a spatially hierarchical remote sensing network**

*In situ* plot data is important for the more accurate interpretation of ecosystem C dynamics in response to different field

management methods and anthropogenic interventions that involve influences on plant structure and physiology. While plot data provides the most detailed information on rice C and water gas exchange, applying this understanding to broader spatial and temporal domains requires scaling approaches. As mentioned before, the field niche between *in situ* plot and regional dimension is supposed to be a key chain of a spatially hierarchical remote sensing network (Masek et al., 2015; Pause et al., 2016). Applications of the data fusion at the microsite/field scale that combine observations of *in situ* canopy structure and function with field crop information derived from the UAV system capture critical growth information of rice crop in space.

Spatial variations in  $GPP_{day}$  over PD nutrient groups and RF rice tend to be primarily mediated by LAI. Canopy structure (i.e., LAI) is the main biotic factor in rice ecosystems that could have a great impact on the seasonal course of ecosystem photosynthetic productivity, consistent with previous reports (Xue et al., 2017). Nevertheless, the scenario analysis in Fig. 8 documented marked underestimations of  $GPP_{day}$  in RF rice at the beginning of ripening stage when applying  $LUE_{cabs}$  of PD rice in spatial monitoring of  $GPP_{day}$  in the RF field. Spatial fluctuations of daily GPP at the ripening stage, when canopy LAI is maximized, could directly contribute to variations of overall growth season photosynthetic productivity in rice (Xue et al., 2017). Furthermore, enhanced  $LUE_{cabs}$  in RF rice may reflect improved N accumulation capacity after 180 DOY (Fig. 4) or efficient P uptake (Kato et al., 2016) that we did not quantify. Changes in leaf N allocation within leaves that relate to photosynthetic activity of individual leaves may also have important implications like improved plant biomass production (Karaba et al., 2007; Wang et al., 2014) or may not affect biomass (Tanaka et al., 2013; Dow and Bergmann, 2014), and must be investigated along with canopy structure. Such investigations will need to consider variations in canopy leaf physiology for the same plant function type across various habitat conditions. The result will hopefully better monitoring of per-field photosynthetic productivity and biological interpretation of its spatial patterns using remote sensing technique.

## 5 Conclusions

As far as we know, this is the first work aiming to assess influences of N and water availability in spatial and temporal patterns of the rice ecosystem photosynthetic productivity at the micro scale. Abundant and high-quality data derived from the close-range remote sensing system reflect crop growth information linked biotic and abiotic factors at critical growth stages. Application of the data assimilation concept indicated that fertilizer addition in the PD rice field enhanced spatial variations of  $GPP_{day}$  and LAI as well as  $LUE_{cabs}$  during early growth. Change planting culture from flooded to rainfed conditions contributed to greater spatial heterogeneity of those traits. Nevertheless, nutritional effects in the PD rice at the early growth stage produced greater spatial heterogeneity in  $LUE_{cabs}$  in PD fields. Physiological basis related to  $LUE_{cabs}$  in RF rice highlights that incorporate spatial variations of canopy leaf physiology for the same plant function type into field gas exchange modelling campaigns could substantially improve evaluation of ecosystem photosynthetic production at regional/continental scales.



## Appendices

*Acknowledgement.* This study was supported by the Basic Science Research Program through the National Research Foundation of Korea (NRF), funded by the Ministry of Education, Science, and Technology (NRF-2013R1A2005788). We thank the agricultural logistics group of CNU for the field management. We acknowledge the help in the field by Steve Lindner, Bhone Nay-Htoon, Jinsil Choi, Seung Hyun Jo, Toncheng Fu, Fabian Fischer, Nikolas Lichtenwald and Yannic Ege. We gratefully acknowledge the technical assistance of Ms. Margarete Wartinger for all her support in the field and laboratory.

## References

- Adiku, S., Reichstein, M., Lohila, A., Dinh, N., Aurela, M., Laurila, T., Lueers, J. and Tenhunen, J.: PIXGRO: a model for simulating the ecosystem CO<sub>2</sub> exchange and growth of spring barley, *Ecol. Model.*, 190, 260-276, 2006.
- Alton, P. B.: Retrieval of seasonal Rubisco-limited photosynthetic capacity at global FLUXNET sites from hyperspectral satellite remote sensing: impact on carbon modelling, *Agr. Forest Meteorol.*, 232, 74-88, 2017.
- Bausch, W. and Khosla, R.: QuickBird satellite versus ground-based multi-spectral data for estimating nitrogen status of irrigated maize, *Precis. Agric.*, 11, 274-290, 2010.
- Cao, Q., Cui, Z., Chen, X., Khosla, R., Dao, T.H. and Miao, Y.: Quantifying spatial variability of indigenous nitrogen supply for precision nitrogen management in small scale farming, *Precis. Agric.*, 13, 45-61, 2012.
- Devendra, C.: Small farm system to feed hungry Asia, *Outlook Agric.*, 36, 17-20, 2007.
- Dow, G.J. and Bergmann, D.C.: Patterning and processes: how stomatal development defines physiological potential, *Curr. Opin Plant Biol.*, 21, 67-74, 2014.
- Fisher, P., Abuzar, M., Rab, M., Best, F., Chandra, S.: Advances in precision agriculture in south-eastern Australia. I. A regression methodology to simulate spatial variation in cereal yields using farmers' historical paddock yields and normalised difference vegetation index, *Crop Pasture Sci.*, 60, 844-858, 2009.
- Forkel, M., Carvalhais, N., Rödenbeck, C., Keeling, R., Heimann, M., Thonicke, K., Zaehle, S. and Reichstein, M.: Enhanced seasonal CO<sub>2</sub> exchange caused by amplified plant productivity in northern ecosystems, *Science*, 351, 696-699, 2016.
- Gelfand, A.E.: Hierarchical modeling for spatial data problems, *Spat. Stat.*, 1, 30-39, 2012.
- Inoue, Y., Peñuelas, J., Miyata, A. and Mano, M.: Normalized difference spectral indices for estimating photosynthetic efficiency and capacity at a canopy scale derived from hyperspectral and CO<sub>2</sub> flux measurements in rice, *Remote Sens. Environ.*, 112, 156-172, 2008.

- Jeong, S., Ko, J., Kim, M. and Kim, J.: Construction of an unmanned aerial vehicle remote sensing system for crop monitoring, *J. Appl. Remote Sens.*, 10, doi:10.1117/1.JRS.10.026027, 2016.
- Jo, S. H. and Ko, J. H.: Determining canopy growth conditions of paddy rice via ground-based remote sensing, *Korea J. Remote Sens.*, 31, 11-20, 2015.
- 5 Karaba, A., Dixit, S., Greco, R., Aharoni, A., Trijatmiko, K. R., Marsch-Martinez, N., Krishnan, A., Nataraja, K. N., Udayakumar, M. and Pereira, A.: Improvement of water use efficiency in rice by expression of HARDY, an Arabidopsis drought and salt tolerance gene. *Proc. Natl. Acad. Sci. U. S. A.*, 104, 15270-15275, 2007.
- Kato, Y., Tajima, R., Toriumi, A., Homma, K., Moritsuka, N., Shiraiwa, T., Yamagishi, J., Mekwatanakern, P., Chamarek, V., Jongdee, B.: Grain yield and phosphorus uptake of rainfed lowland rice under unsubmerged soil stress, *Field Crop.*
- 10 *Res.*, 190, 54-59, 2016.
- Kim, K. Y., Ha, K. Y., Ko, J. C., Choung, J. I., Lee, J. K., Ko, J. K., Kim, B. K., Nam, J. K., Shin, M. S., Choi, Y. H.: A new early maturity rice cultivar, "Unkwang" with high grain quality and cold tolerance, *Korea J. Breed.*, 38, 261-262, 2006.
- Ko, J., Jeong, S., Yeom, J., Kim, H., Ban, J. O. and Kim, H. Y.: Simulation and mapping of rice growth and yield based on remote sensing, *J. Appl. Remote Sens.*, 9, 096067, doi:10.1117/1.JRS.9.096067, 2015.
- 15
- Kwon, H., Kim, J., Hong, J. and Lim, J.: Influence of the Asian monsoon on net ecosystem carbon exchange in two major ecosystems in Korea, *Biogeosciences*, 7, 1493-1504, 2010.
- Lausch, A., Bannehr, L., Beckmann, M., Boehm, C., Feilhauer, H., Hacker, J., Heurich, M., Jung, A., Klenke, R. and Neumann, C.: Linking earth observation and taxonomic, structural and functional biodiversity: local to ecosystem
- 20 perspectives, *Ecol. Indic.*, 70, 317-339, 2016.
- Lee, B.: Remote sensing-based assessment of gross primary production in agricultural ecosystems, In: Ph.D Thesis, University of Bayreuth, pp. 134, 2014.
- Lindner, S., Otieno, D., Lee, B., Xue, W., Arnhold, S., Kwon, H., Huwe, B. and Tenhunen, J.: Carbon dioxide exchange and its regulation in the main agro-ecosystems of Haean catchment in South Korea, *Agr. Ecosyst. Environ.*, 199, 132-145,
- 25 2015.
- Lindner, S., Xue, W., Nay-Htoon, B., Choi, J., Ege, Y., Lichtenwald, N., Fischer, F., Ko, J., Tenhunen, J. and Otieno, D.: Canopy scale CO<sub>2</sub> exchange and productivity of transplanted paddy and direct seeded rainfed rice production systems in S. Korea, *Agr. Forest Meteorol.*, 228, 229-238, 2016.
- Loescher, H., Ayres, E., Duffy, P., Luo, H., Brunke, M.: Spatial variation in soil properties among North American
- 30 ecosystems and guidelines for sampling designs, *Plos one*, 9, e83216, doi.org/10.1371/journal.pone.0083216, 2014.
- Masek, J.G., Hayes, D.J., Hughes, M.J., Healey, S.P. and Turner, D.P.: The role of remote sensing in process-scaling studies of managed forest ecosystems, *Forest Ecol. Manag.*, 355, 109-123, 2015.

- Niinemets, Ü. and Tenhunen, J.: A model separating leaf structural and physiological effects on carbon gain along light gradients for the shade-tolerant species *Acer saccharum*, *Plant Cell Environ.*, 20, 845-866, 1997.
- Pause, M., Schweitzer, C., Rosenthal, M., Keuck, V., Bumberger, J., Dietrich, P., Heurich, M., Jung, A. and Lausch, A.: In situ/remote sensing integration to assess forest health-a review, *Remote Sens.*, 8, 471, doi:10.3390/rs8060471, 2016.
- 5 Pierson, F. B. and Wight, J. R.: Variability of near-surface soil temperature on sagebrush rangeland, *J. Range Manage.*, 491-497, 1991.
- Richardson, A. D., Keenan, T. F., Migliavacca, M., Ryu, Y., Sonnentag, O. and Toomey, M.: Climate change, phenology, and phenological control of vegetation feedbacks to the climate system, *Agr. Forest Meteorol.*, 169, 156-173, 2013.
- Swain, K. C., Thomson, S. J., Jayasuriya, H. P.: Adoption of an unmanned helicopter for low-altitude remote sensing to estimate yield and total biomass of a rice crop, *T. ASABE*, 53, 21-27, 2010.
- 10 Seo, B., Bogner, C., Poppenborg, P., Martin, E., Hoffmeister, M., Jun, M., Koellner, T., Reineking, B., Shope, C. and Tenhunen, J.: Deriving a per-field land use and land cover map in an agricultural mosaic catchment, *Earth Syst. Sci. Data*, 6, 339-352, 2014.
- Serraj, R., Bennett, J. and Hardy, B.: Drought frontiers in rice: crop improvement for increased rainfed production, 15 *International Rice Research Institute, Manila, Philippines*, pp. 385, 2008.
- Sinclair, T. and Horie, T.: Leaf nitrogen, photosynthesis, and crop radiation use efficiency: a review, *Crop Sci.*, 29, 90-98, 1989.
- Stedle, E.: Water uptake by roots: effects of water deficit, *J. Exp. Bot.*, 51, 1531-1542, 2000.
- Tanaka, Y., Sugano, S. S., Shimada, T. and Hara-Nishimura, I.: Enhancement of leaf photosynthetic capacity through increased stomatal density in *Arabidopsis*, *New Phytol.*, 198, 757-764, 2013.
- 20 Tenhunen, J., Geyer, R., Adiku, S., Reichstein, M., Tappeiner, U., Bahn, M., Cernusca, A., Dinh, N., Kolcun, O. and Lohila, A.: Influences of changing land use and CO<sub>2</sub> concentration on ecosystem and landscape level carbon and water balances in mountainous terrain of the Stubai Valley, Austria, *Global Planet. Change*, 67, 29-43, 2009.
- Tubaña, B., Harrell, D., Walker, T., Teboh, J., Lofton, J., Kanke, Y.: In-season canopy reflectance-based estimation of rice yield response to nitrogen, *Agron. J.*, 104, 1604-1611, 2012.
- 25 Van Genuchten, M.T.: A closed-form equation for predicting the hydraulic conductivity of unsaturated soils, *Soil Sci. Soc. Am. J.*, 44, 892-898, 1980.
- Vieira, S., Hatfield, J., Nielsen, D. and Biggar, J.: Geostatistical theory and application to variability of some agronomical properties, *Hilgardia*, 51, 1-75, 1983.
- 30 Wang, Y., Noguchi, K., Ono, N., Inoue, S., Terashima, I. and Kinoshita, T.: Overexpression of plasma membrane H<sup>+</sup>-ATPase in guard cells promotes light-induced stomatal opening and enhances plant growth. *Proc. Natl. Acad. Sci. U. S. A.*, 111, 533-538, 2014.

- Wehrhan, M., Rauneker, P. and Sommer, M.: UAV-based estimation of carbon exports from heterogeneous soil landscapes-a case study from the CarboZALF experimental area, *Sensors*, 16, 255, doi:10.3390/s16020255, 2016.
- Xue, W., Lindner, S., Dubbert, M., Otieno, D., Ko, J., Muraoka, H., Werner, C. and Tenhunen, J.: Supplement understanding of the relative importance of biophysical factors in determination of photosynthetic capacity and photosynthetic productivity in rice ecosystems, *Agr. Forest Meteorol.*, 232, 550-565, 2017.
- Xue, W., Lindner, S., Nay-Htoon, B., Dubbert, M., Otieno, D., Ko, J., Muraoka, H., Werner, C., Tenhunen, J. and Harley, P.: Nutritional and developmental influences on components of rice crop light use efficiency, *Agr. Forest Meteorol.*, 223, 1-16, 2016a.
- Xue, W., Nay-Htoon, B., Lindner, S., Dubbert, M., Otieno, D., Ko, J., Werner, C. and Tenhunen, J.: Soil water availability and capacity of nitrogen accumulation influence variations of intrinsic water use efficiency in rice, *J. Plant Physiol.*, 193, 26-36, 2016b.
- Xue, W., Otieno, D., Ko, J., Werner, C. and Tenhunen, J.: Conditional variations in temperature response of photosynthesis, mesophyll and stomatal control of water use in rice and winter wheat, *Field Crop. Res.*, 199, 77-88, 2016c.
- Yoshida, S. *Fundamentals of rice crop science*, International Rice Research Institute, Manila, Philippines, pp. 279, 1981.
- Zhang, C. and Kovacs, J.M.: The application of small unmanned aerial systems for precision agriculture: a review, *Precis. Agric.*, 13, 693-712, 2012.

Figure and Table

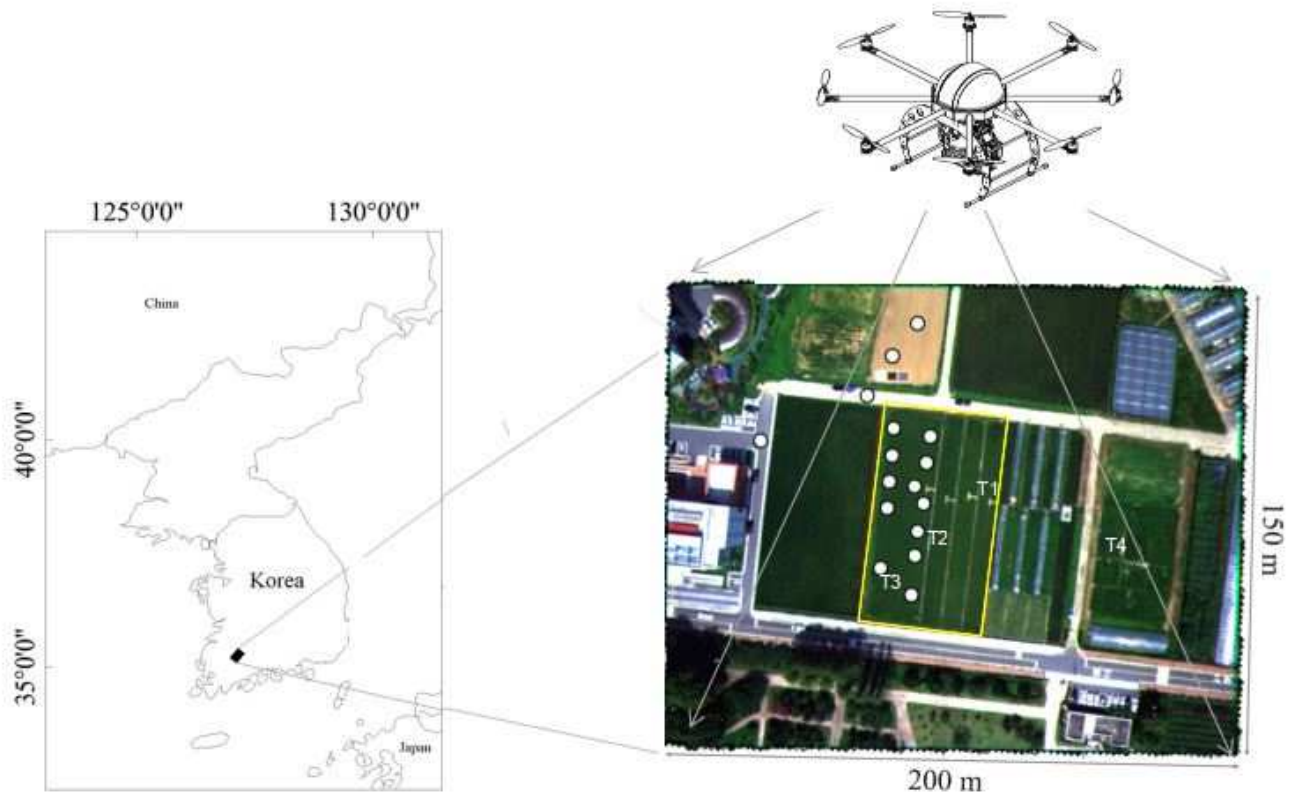

**Figure 1.** Illustration of the Gwangju study site where field data collection was carried out in 2013. Yellow square and white circles represent sites of paddy fields and those marked for measurements of ground reflectance by one handheld MSR to validate UAV imagery. T1: paddy rice under low nutrient condition (no supplementary nitrogen applied); T2: PD rice under high nutrient condition ( $180 \text{ kg N ha}^{-1}$ ); T3: PD rice under normal nutrient condition ( $115 \text{ kg N ha}^{-1}$ ), and T4: RF rice ( $115 \text{ kg N ha}^{-1}$ ). PD: paddy; RF: rainfed

10

15

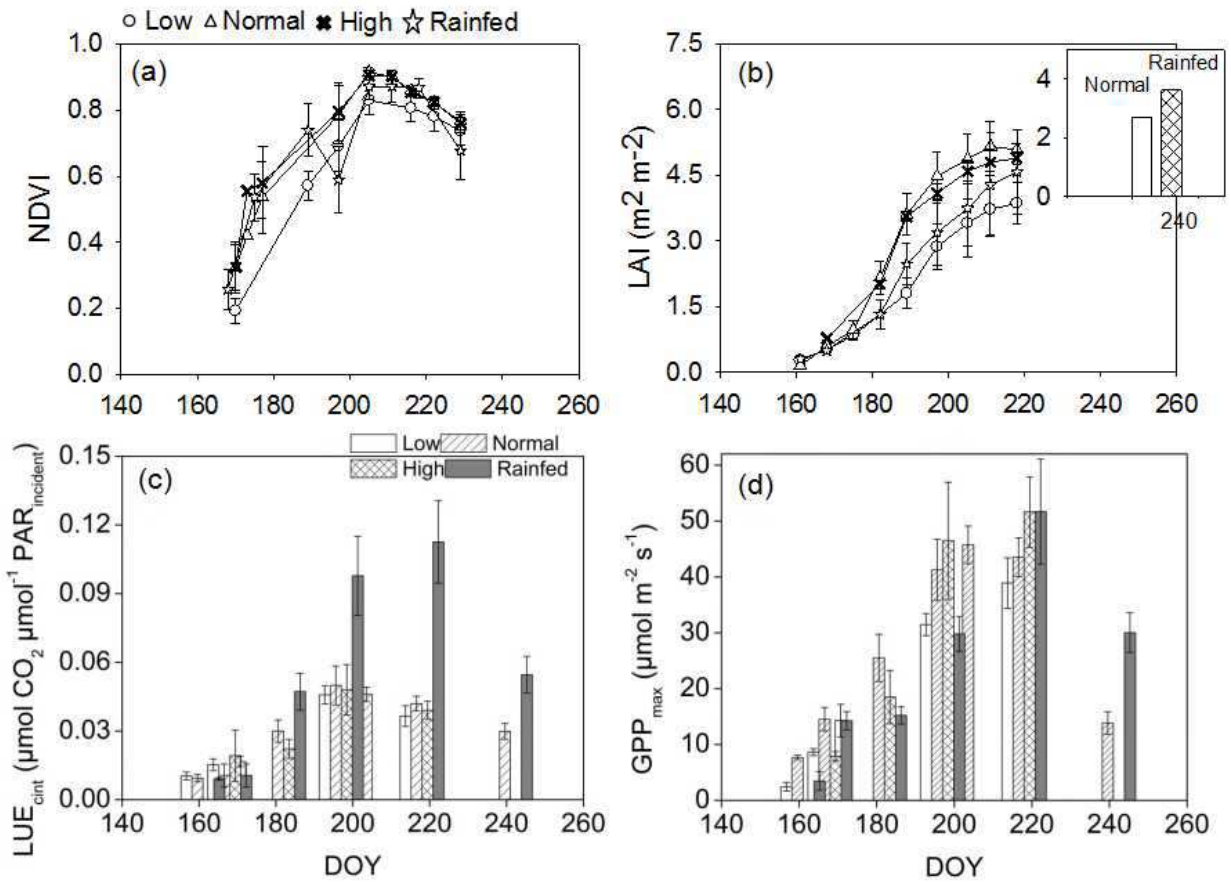

**Figure 2.** Seasonal courses of (a) normalized difference vegetation index (NDVI), (b) leaf area index (LAI), (c) canopy light use efficiency based on incident PAR ( $LUE_{cint}$ ), and (d) maximum gross primary production ( $GPP_{max}$ ) measured at plot level in PD low, normal and high nutrient groups, and in RF rice. Mean  $\pm$  SD, n= 3 to 6. DOY: day of year. PD: paddy; RF: rainfed

10

15

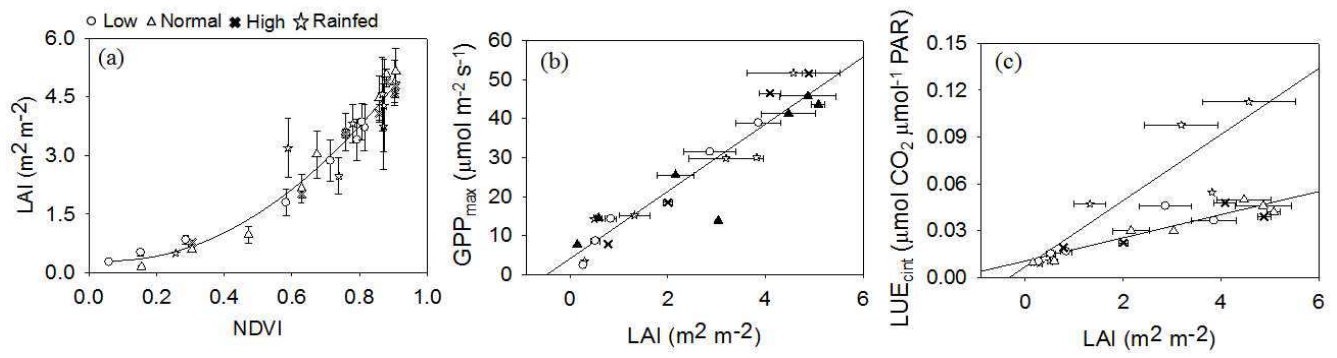

**Figure 3.** Correlations between (a) normalized difference vegetation index (NDVI) and leaf area index (LAI), (b) maximum gross primary productivity (GPP<sub>max</sub>) and LAI, and (c) canopy light use efficiency (LUE<sub>cint</sub>) and LAI across PD low, normal and high nutrient groups, and in RF rice. Mean ± SD, n= 3 to 6. PD: paddy; RF: rainfed

5

10

15

20

25

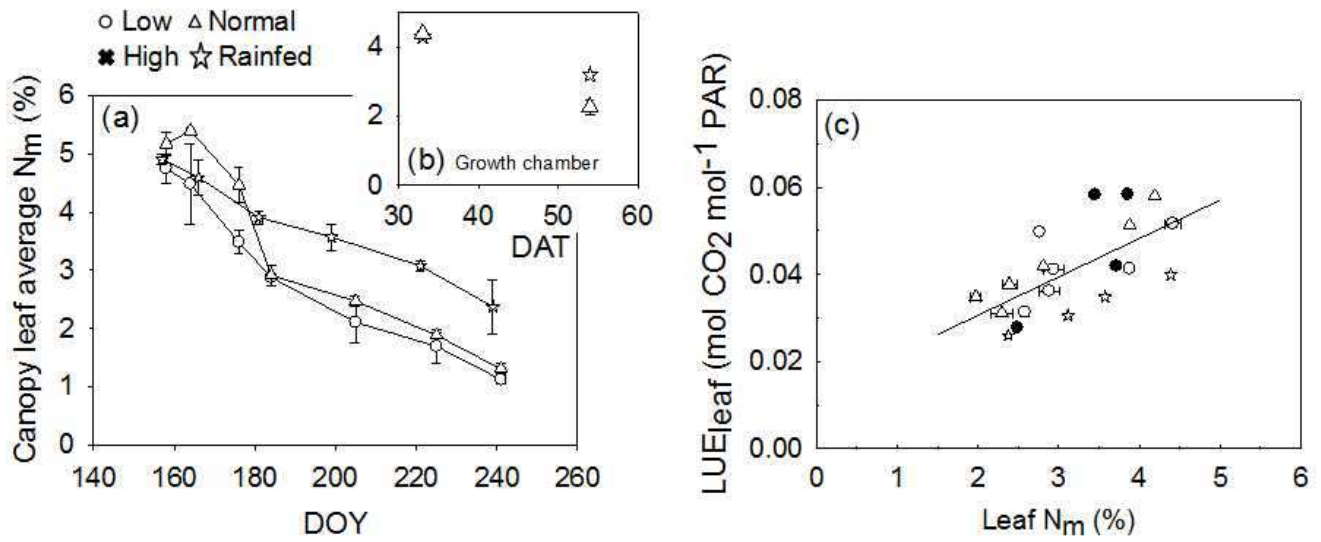

**Figure 4.** Seasonal development of leaf nitrogen content ( $N_m$ ) in (a) the PD low, normal and high nutrient groups, and in the RF rice in the field, and (b) in the PD and RF rice grown in controlled growth chamber. (c) Correlation between leaf light use efficiency ( $LUE_{leaf}$ ) and  $N_m$  crossing the PD and RF rice. Mean  $\pm$  SD,  $n = 3$  to 6. DOY: day of year. DAT: day after transplanting. PD: paddy; RF: rainfed

10

15

20



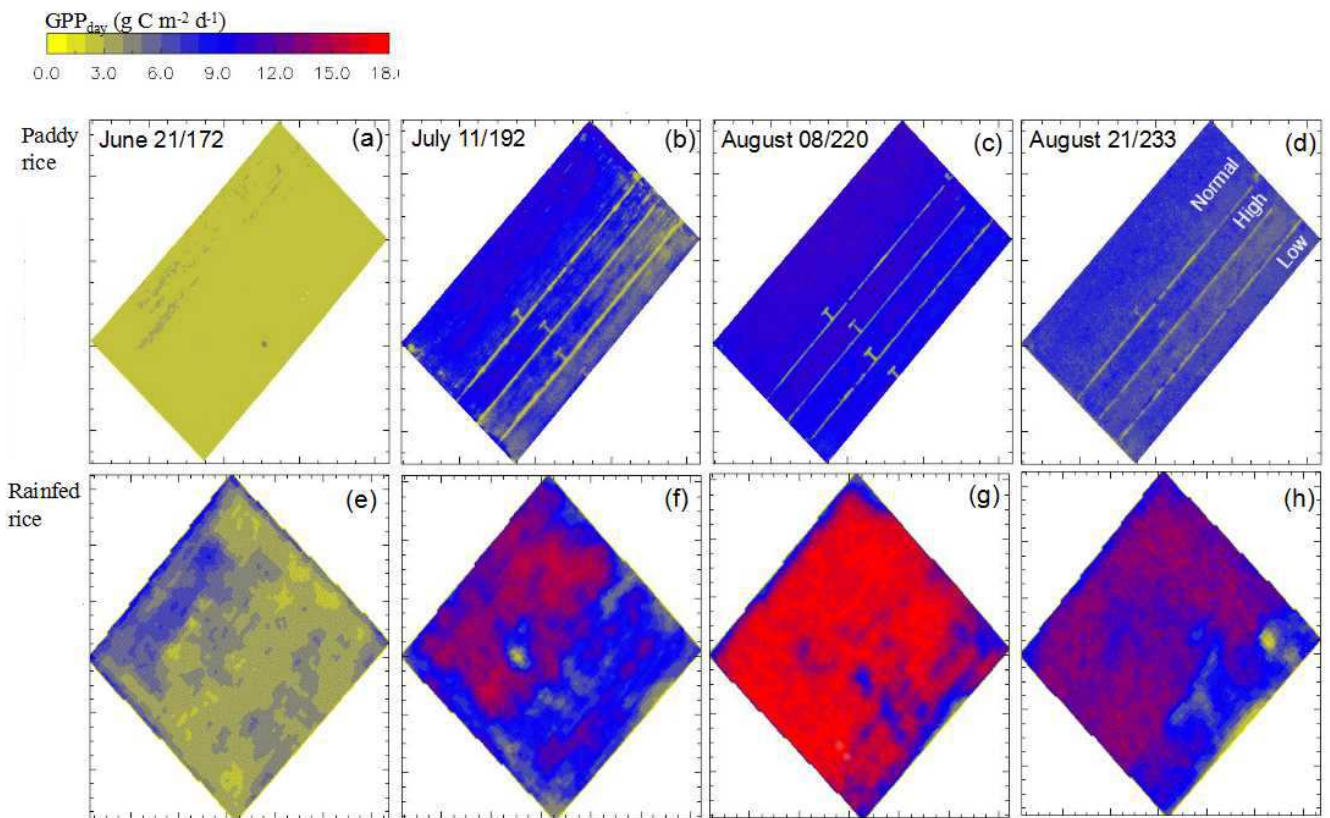

**Figure 5.** Field mapping of ecosystem gross primary productivity (GPP) in the PD rice and RF rice at principle growth stages: vegetative stage (June 21/172), middle reproductive stage (July 11/192), early ripening stage (August 08/220), and middle ripening stage (August 21/233). Date are expressed as MM DD/DOY. DOY: day of year; PD: paddy; RF: rainfed

5

10

15

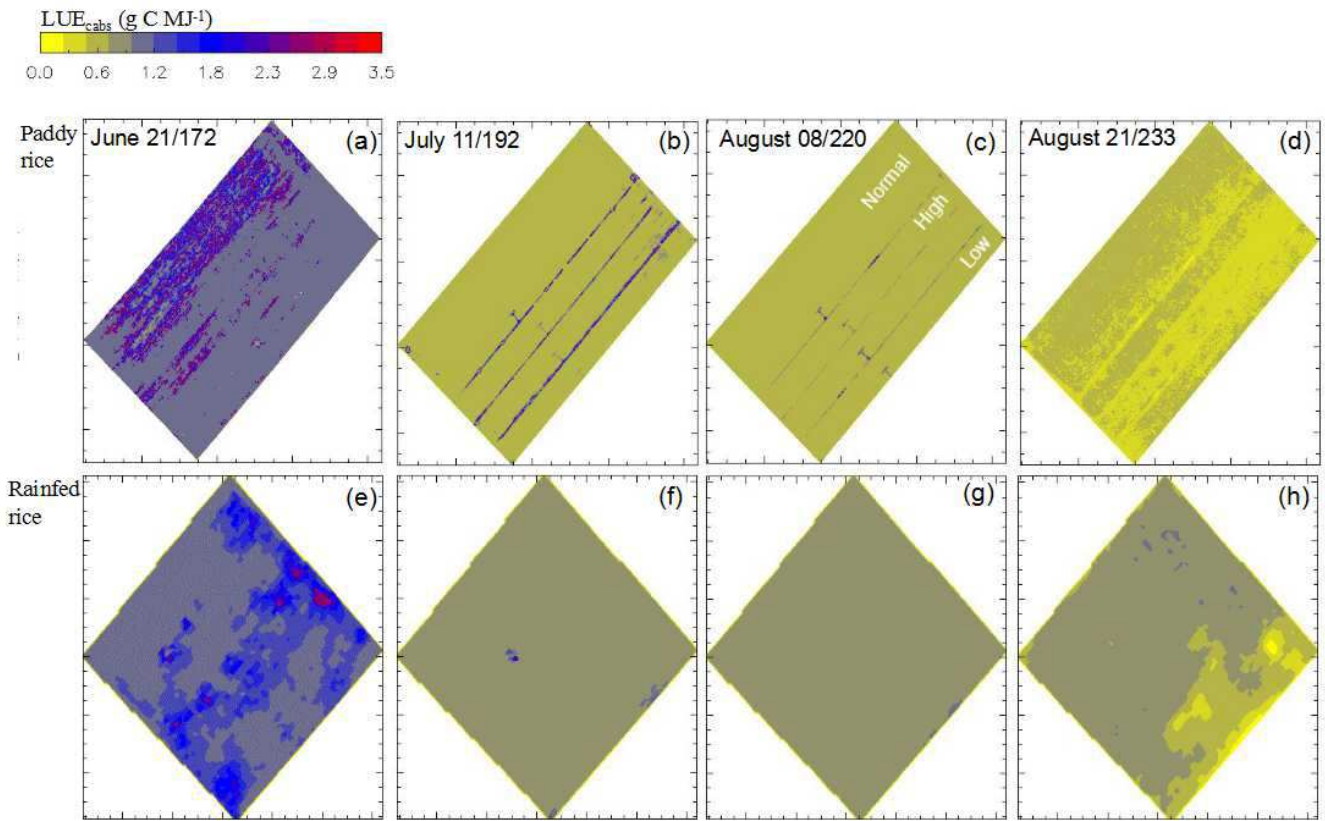

**Figure 6.** Field mapping of canopy light use efficiency ( $LUE_{cabs}$ ) in the PD rice and RF rice at principle growth stages: vegetative stage (June 21/172), middle reproductive stage (July 11/192), early ripening stage (August 08/220), and middle ripening stage (August 21/233). Date are expressed as MM DD/DOY. DOY: day of year; PD: paddy; RF: rainfed

5

10

15

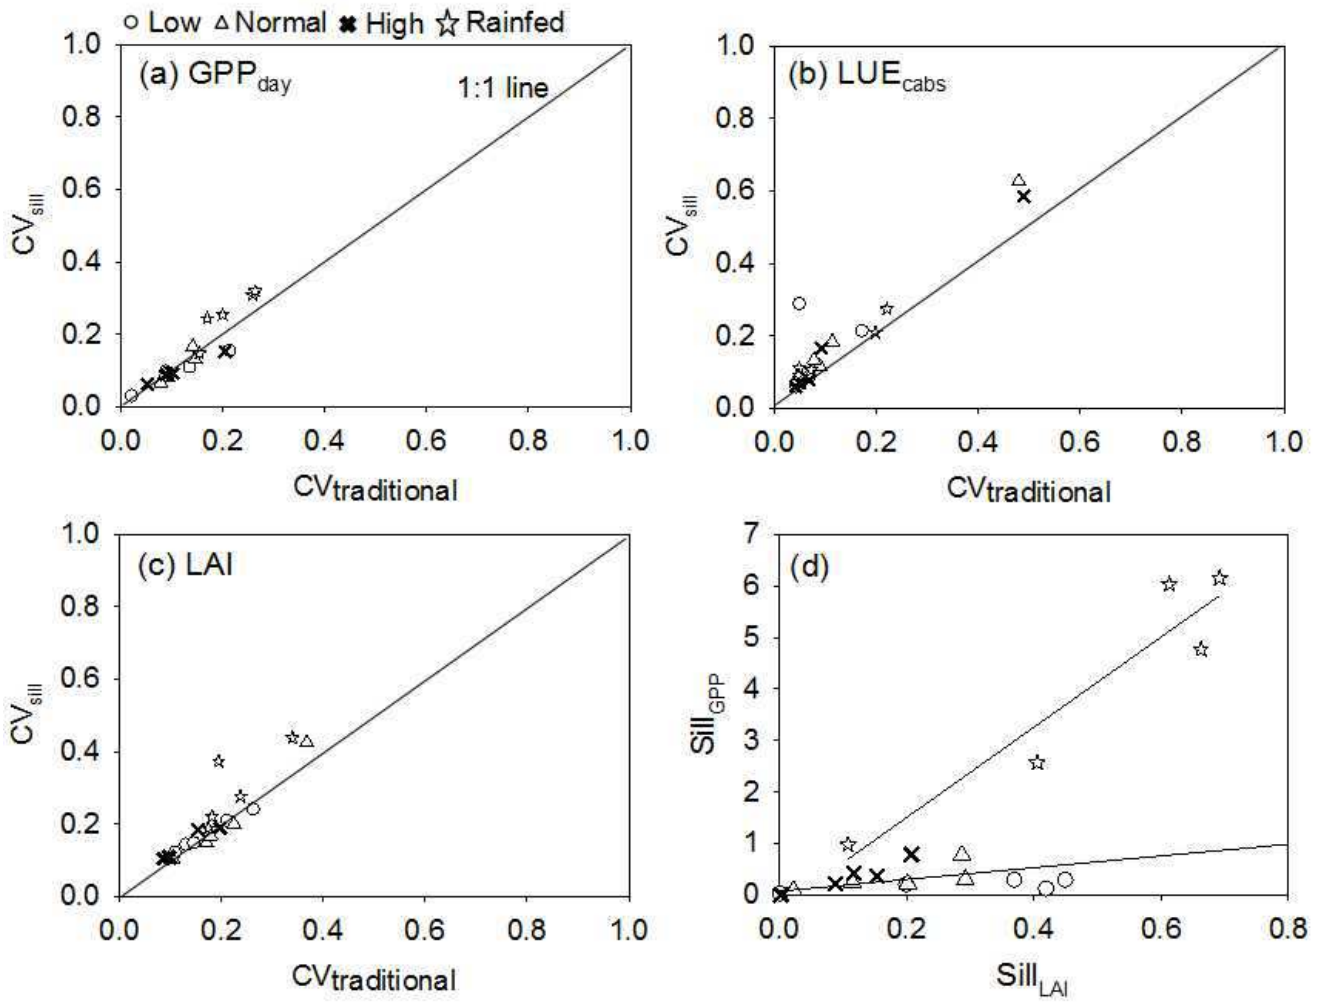

**Figure 7.** Coefficient of variation calculated by dividing the standard deviation by the mean ( $CV_{traditional}$ ) versus coefficient of variation calculated using the semi-variogram sill ( $CV_{sill}$ ) across the PD nutrient groups and the RF rice for variables (a)  $GPP_{day}$ , (b)  $LUE_{cabs}$ , and (c) LAI. Subplot d shows relationships for  $sill_{GPP}$ - $sill_{LAI}$  in the PD and RF rice. RF: rainfed; PD:

5 paddy

10

15

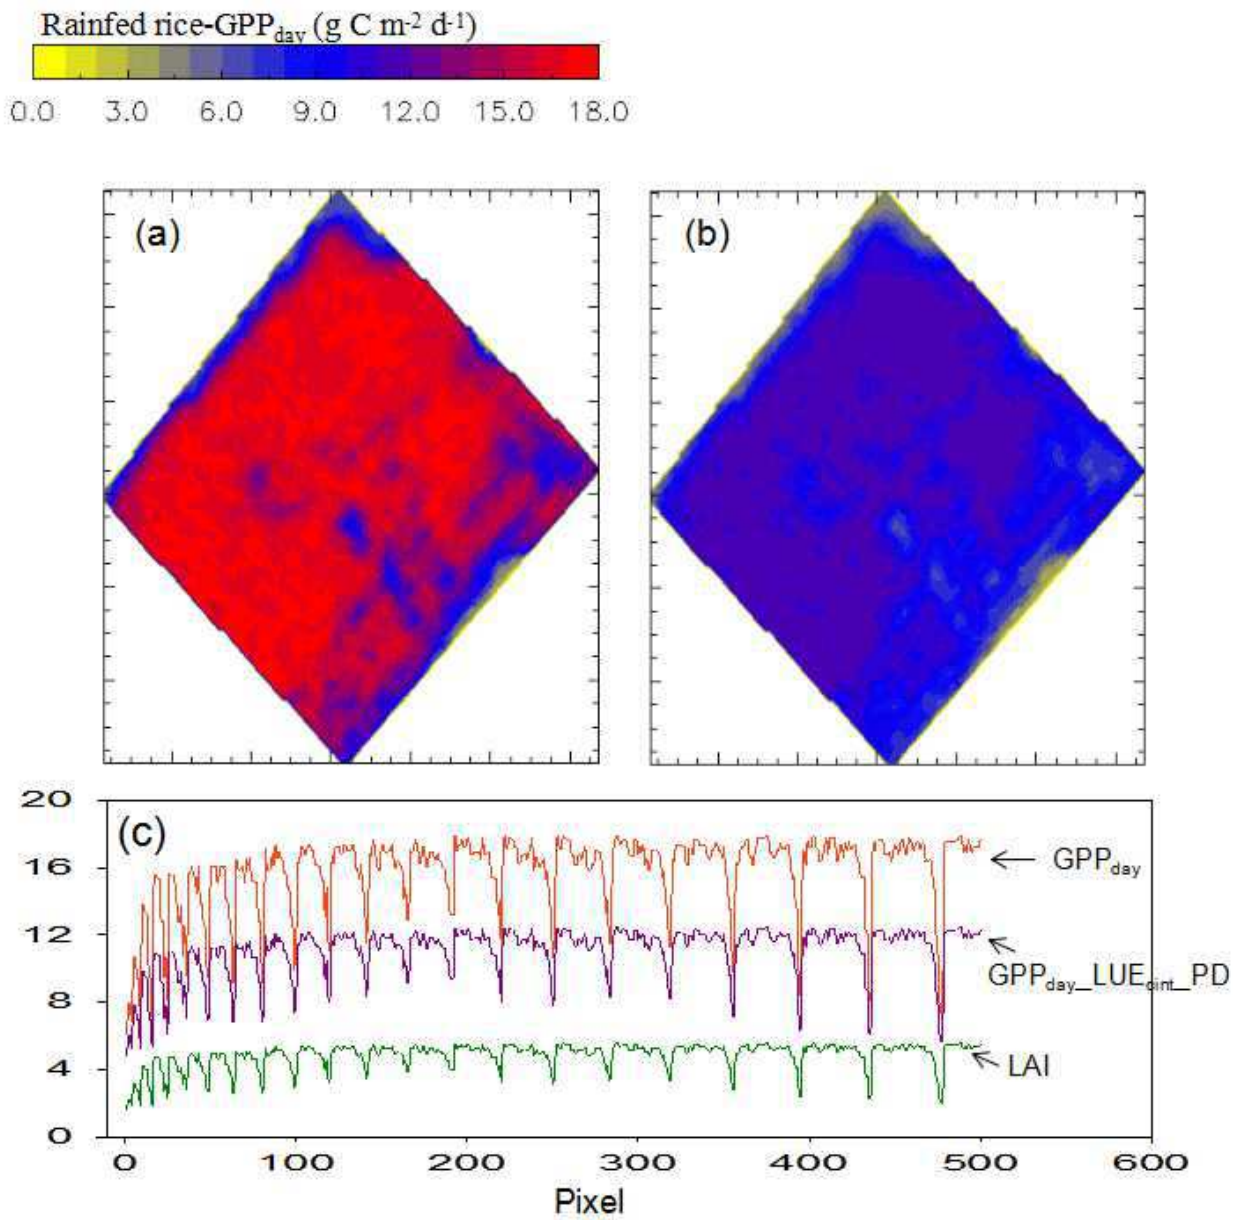

**Figure 8.** Evaluation of the potential effects of light use efficiency ( $LUE_{cint}$ ) in ecosystem photosynthetic productivity ( $GPP_{day}$ ) in field RF rice at the ripening stage.  $GPP_{day}$  estimation of RF rice was carried out by adopting the  $LUE_{cint}$  value of PD rice at the ripening stage.  $GPP_{day}$  estimation using (a) observed  $LUE_{cint}$  in RF rice, (b) using  $LUE_{cint}$  of PD rice ( $GPP_{day\_LUE_{cint\_PD}}$ ), and (c) quantitative comparisons between  $GPP_{day}$  and  $GPP_{day\_LUE_{cint\_PD}}$  as referred to leaf area index (LAI) in reference pixel. PD: paddy; RF: rainfed

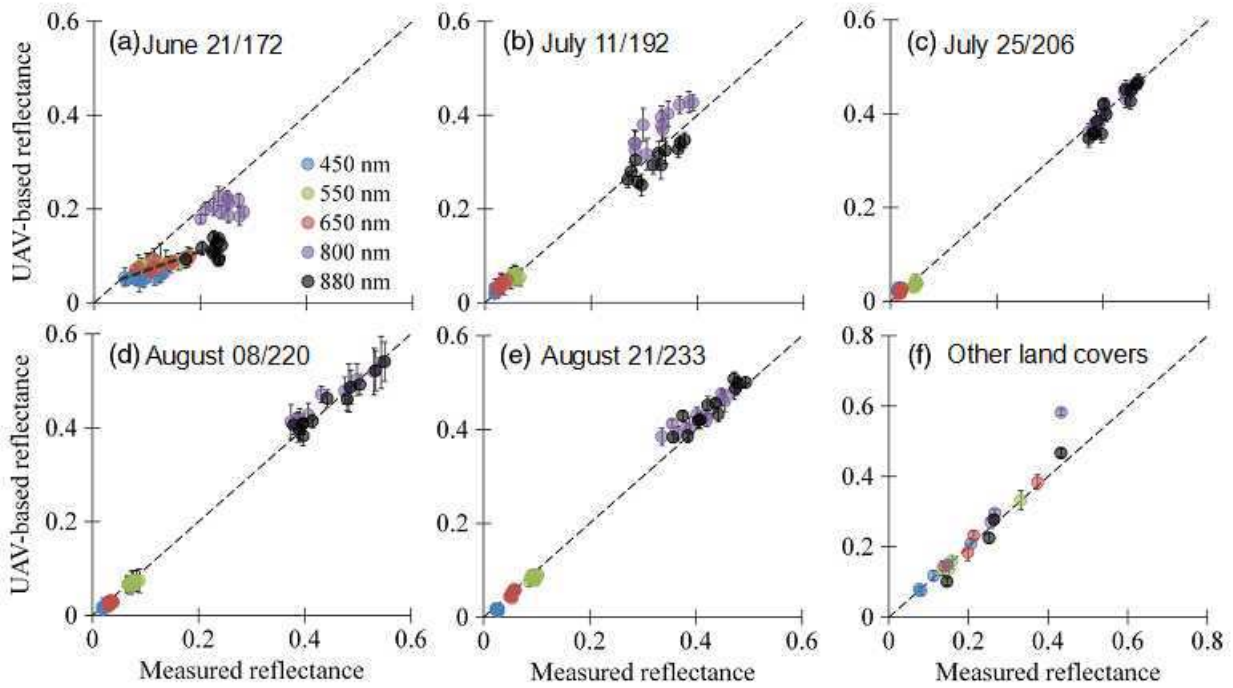

**Figure A1.** Validation of calibrated UAV-based reflectance by measurements of group point reflectance set up in paddy fields across the whole growing season (a-e) and in other land covers obtained on 172, 192, and 220 day of year (DOY) including bright cement, dark asphalt, bare soil, and tilled soil (f). Dash line in each subplot shows 1:1 ratio. Recalibration for UAV-based reflectance in red waveband was conducted on June 21 (172 DOY), shown in subplot a (coarse dash line).

10

15

20

**Table 1.** Values of coefficients for Eqs 3-7

| Eqs.  | Coef.               | Values | Coef.               | Values | Coef.               | Values | Coef. | Values |
|-------|---------------------|--------|---------------------|--------|---------------------|--------|-------|--------|
| Eq. 2 | a <sub>2_PD</sub>   | 0.0074 | b <sub>2_PD</sub>   | 0.0107 |                     |        |       |        |
|       | a <sub>2_RF</sub>   | 0.0211 | b <sub>2_RF</sub>   | 0.0070 |                     |        |       |        |
| Eq. 3 | a <sub>3</sub>      | 8.571  | b <sub>3</sub>      | 4.081  |                     |        |       |        |
| Eq. 4 | a <sub>1</sub>      | 7.398  | b <sub>1</sub>      | -1.752 | c <sub>1</sub>      | 0.452  |       |        |
| Eq. 6 | fPAR <sub>max</sub> | 0.95   | NDVI <sub>max</sub> | 0.94   | NDVI <sub>min</sub> | 0.11   | ε     | 0.6    |
| Eq. 7 | a <sub>4</sub>      | 0.169  | b <sub>4</sub>      | 0.765  |                     |        |       |        |

\* Values of coefficients for Eq. 7 were derived from Inoue et al. (2008).

PD: paddy rice; RF: rainfed rice.

5

10

15

20

25

**Table 2.** Descriptive statistics of ecosystem photosynthetic productivity ( $GPP_{day}$ ,  $g\ C\ m^{-2}\ d^{-1}$ ) and light use efficiency ( $LUE_{cabs}$ ,  $g\ C\ MJ^{-1}$ ) at each nutrient treatment in PD rice and at RF rice

| $GPP_{day}$        | $LUE_{cabs}$ |        |        |         |        |        |        |         |
|--------------------|--------------|--------|--------|---------|--------|--------|--------|---------|
|                    | Low          | Normal | High   | Rainfed | Low    | Normal | High   | Rainfed |
| June 21 /172 DOY   |              |        |        |         |        |        |        |         |
| Mean               | 2.32         | 2.56   | 2.33   | 4.53    | 1.16   | 1.67   | 1.43   | 1.3     |
| Max.               | 3.78         | 7.29   | 3.51   | 10.57   | ~3.50  | ~3.50  | ~3.50  | 3.18    |
| $CV_{traditional}$ | 2.16%        | 14.06% | 5.15%  | 25.81%  | 17.24% | 47.90% | 48.95% | 22.00%  |
| July 11 /192 DOY   |              |        |        |         |        |        |        |         |
| Mean               | 6.16         | 9.57   | 8.35   | 10.99   | 0.68   | 0.62   | 0.73   | 0.86    |
| Max.               | 11.21        | 12.73  | 11.97  | 16.93   | 1.72   | 2.75   | 2.86   | 2.35    |
| $CV_{traditional}$ | 21.36%       | 14.52% | 20.37% | 26.32%  | 4.92%  | 11.29% | 9.20%  | 7.09%   |
| July 25 /206 DOY   |              |        |        |         |        |        |        |         |
| Mean               | 7.93         | 9.74   | 9.45   | 14.28   | 0.7    | 0.68   | 0.68   | 1.08    |
| Max.               | 10.97        | 11     | 11.04  | 17.15   | 0.87   | 1.32   | 1.06   | 1.79    |
| $CV_{traditional}$ | 13.55%       | 9.22%  | 10.12% | 16.89%  | 4.38%  | 8.82%  | 4.94%  | 4.81%   |
| August 08 /220 DOY |              |        |        |         |        |        |        |         |
| Mean               | 9.56         | 10.85  | 10.57  | 15.41   | 0.66   | 0.62   | 0.63   | 0.87    |
| Max.               | 12.28        | 12.49  | 12.41  | 18.11   | 1.58   | 1.42   | 1.57   | 0.95    |
| $CV_{traditional}$ | 8.89%        | 7.77%  | 8.77%  | 15.36%  | 4.54%  | 4.19%  | 4.12%  | 4.65%   |
| August 21 /233 DOY |              |        |        |         |        |        |        |         |
| Mean               | 7.13         | 7.69   | 7.45   | 12.14   | 0.49   | 0.52   | 0.52   | 0.81    |
| Max.               | 9.94         | 10.73  | 10.22  | 15.91   | 0.66   | 0.71   | 0.68   | 1.05    |
| $CV_{traditional}$ | 9.23%        | 8.49%  | 8.88%  | 19.91%  | 6.93%  | 7.69%  | 6.73%  | 19.75%  |

Measuring date (MM DD/DOY). DOY: day of year. PD: paddy; RF: rainfed

5

10

15

**Table 3.** Sill values of semi-variograms and  $CV_{sill}$  for  $GPP_{day}$  ( $g\ C\ m^{-2}\ d^{-1}$ , upper part), LAI ( $m^2\ m^{-2}$ , middle part), and  $LUE_{cabs}$  ( $g\ C\ MJ^{-1}$ , lower part) at PD rice subject to low, normal and high nutrient gradients and at RF rice over the growing seasons: vegetative stage (June 21), reproductive stage (July 11 and 25), ripening stage (August 08 and 21)

| Growth stage                   | Date/DOY      | Low    |             | Normal |             | High   |             | Rainfed |             |
|--------------------------------|---------------|--------|-------------|--------|-------------|--------|-------------|---------|-------------|
|                                |               | Sill   | $CV_{sill}$ | Sill   | $CV_{sill}$ | Sill   | $CV_{sill}$ | Sill    | $CV_{sill}$ |
| <b><math>GPP_{day}</math></b>  |               |        |             |        |             |        |             |         |             |
| Vegetative                     | June 21/172   | 0.01   | 2.86%       | 0.09   | 16.57%      | 0.01   | 6.10%       | 0.98    | 30.91%      |
| Reproductive                   | July 11/192   | 0.45   | 15.40%      | 0.78   | 13.05%      | 0.79   | 15.05%      | 6.15    | 31.91%      |
|                                | July 25/206   | 0.37   | 10.85%      | 0.31   | 8.08%       | 0.37   | 9.10%       | 6.03    | 24.32%      |
| Ripening                       | August 08/220 | 0.42   | 9.59%       | 0.25   | 6.52%       | 0.43   | 8.77%       | 2.57    | 14.71%      |
|                                | August 21/233 | 0.20   | 8.87%       | 0.23   | 8.82%       | 0.22   | 8.90%       | 4.77    | 25.44%      |
| <b>LAI</b>                     |               |        |             |        |             |        |             |         |             |
| Vegetative                     | June 21/172   | 0.0015 | 14.19%      | 0.0219 | 42.48%      | 0.0026 | 18.40%      | 0.1079  | 43.75%      |
| Reproductive                   | July 11/192   | 0.1111 | 20.81%      | 0.2869 | 19.96%      | 0.2076 | 18.91%      | 0.6915  | 37.36%      |
|                                | July 25/206   | 0.1866 | 14.68%      | 0.2924 | 14.76%      | 0.1535 | 10.71%      | 0.6127  | 22.07%      |
| Ripening                       | August 08/220 | 0.4306 | 23.99%      | 0.1148 | 10.10%      | 0.1174 | 10.37%      | 0.4050  | 18.83%      |
|                                | August 21/233 | 0.0910 | 12.02%      | 0.2015 | 16.72%      | 0.0879 | 11.14%      | 0.6622  | 27.59%      |
| <b><math>LUE_{cabs}</math></b> |               |        |             |        |             |        |             |         |             |
| Vegetative                     | June 21/172   | 0.0302 | 21.19%      | 0.5478 | 62.68%      | 0.3506 | 58.56%      | 0.0633  | 27.37%      |
| Reproductive                   | July 11/192   | 0.0190 | 28.67%      | 0.0065 | 18.39%      | 0.0073 | 16.55%      | 0.0041  | 10.53%      |
|                                | July 25/206   | 0.0008 | 5.71%       | 0.0031 | 11.58%      | 0.0011 | 6.90%       | 0.0070  | 10.96%      |
| Ripening                       | August 08/220 | 0.0011 | 7.11%       | 0.0010 | 7.21%       | 0.0007 | 5.94%       | 0.0032  | 9.20%       |
|                                | August 21/233 | 0.0009 | 8.66%       | 0.0024 | 13.32%      | 0.0008 | 7.69%       | 0.0142  | 20.81%      |

DOY: day of year. PD: paddy; RF: rainfed
